# Supplementary material
Source: PubMed Central journal article supplement (PMC7833522)
Supplement: mmc1.pdf [file mmc1.pdf]

## Supplementary appendix 1

This appendix formed part of the original submission and has been peer reviewed. We post it as supplied by the authors.

Supplement to: Sud A, Torr B, Jones ME, et al. Effect of delays in the 2-week-wait cancer referral pathway during the COVID-19 pandemic on cancer survival in the UK: a modelling study. *Lancet Oncol* 2020; published online July 20. [http://dx.doi.org/10.1016/S1470-2045\(20\)30392-2](http://dx.doi.org/10.1016/S1470-2045(20)30392-2).

**Supplementary Table 1: Assumptions and parameters**

|   | <b>Parameterisation, assumptions and justification</b>                                                                                                                                                                                                                                                                                                                                                                                                                                                                                                                                                                                                                                                                                                                                                                                                                                                                                                                                                                                                                                                                                                                                                                                                                                                                                                                                                                                                                                                                                                                                                                                                                                                                                                                                                                                                                                                                                                                                                                                                                                                                                                                                                                                                                                                                                                                                                                                                                                                                                  | <b>Ref</b> |
|---|-----------------------------------------------------------------------------------------------------------------------------------------------------------------------------------------------------------------------------------------------------------------------------------------------------------------------------------------------------------------------------------------------------------------------------------------------------------------------------------------------------------------------------------------------------------------------------------------------------------------------------------------------------------------------------------------------------------------------------------------------------------------------------------------------------------------------------------------------------------------------------------------------------------------------------------------------------------------------------------------------------------------------------------------------------------------------------------------------------------------------------------------------------------------------------------------------------------------------------------------------------------------------------------------------------------------------------------------------------------------------------------------------------------------------------------------------------------------------------------------------------------------------------------------------------------------------------------------------------------------------------------------------------------------------------------------------------------------------------------------------------------------------------------------------------------------------------------------------------------------------------------------------------------------------------------------------------------------------------------------------------------------------------------------------------------------------------------------------------------------------------------------------------------------------------------------------------------------------------------------------------------------------------------------------------------------------------------------------------------------------------------------------------------------------------------------------------------------------------------------------------------------------------------------|------------|
|   | <b>Cancer survival</b>                                                                                                                                                                                                                                                                                                                                                                                                                                                                                                                                                                                                                                                                                                                                                                                                                                                                                                                                                                                                                                                                                                                                                                                                                                                                                                                                                                                                                                                                                                                                                                                                                                                                                                                                                                                                                                                                                                                                                                                                                                                                                                                                                                                                                                                                                                                                                                                                                                                                                                                  |            |
| 1 | <p>Predicted baseline 10-year survival for patients diagnosed with cancer during 2020 is accurately represented by available data from PHE NCRAS on cancer survival collected 2008-2017.</p> <p><b>Justification:</b> PHE NCRAS cancer data for 2008-2017 represent the best available estimates for 10-year cancer survival in England for each tumour type under standard management in the NHS in England. We recognise nevertheless that these baseline survival figures will have changed due to evolutions in practice and the emergence of new treatments.</p>                                                                                                                                                                                                                                                                                                                                                                                                                                                                                                                                                                                                                                                                                                                                                                                                                                                                                                                                                                                                                                                                                                                                                                                                                                                                                                                                                                                                                                                                                                                                                                                                                                                                                                                                                                                                                                                                                                                                                                   | [1]        |
| 2 | <p>Net 10-year survival reflects cancer-specific mortality.</p> <p><b>Justification:</b> Net survival is based on crude survival with adjustment for background age-specific population-level death rates. Thus, this is a reasonable approximation to cancer-specific mortality.</p> <p><b>Notes:</b> Net survival is censored at 100%. Generating these estimates requires that at least 10 patients are alive at the time of estimation and there are at least 2 deaths in the time either side of estimation. Where net survival could not be generated for a particular age-specific, stage-specific stratum, we utilise the stage-specific survival for the adjacent age-band (younger preferential to older) and indicate this in the respective tables.</p>                                                                                                                                                                                                                                                                                                                                                                                                                                                                                                                                                                                                                                                                                                                                                                                                                                                                                                                                                                                                                                                                                                                                                                                                                                                                                                                                                                                                                                                                                                                                                                                                                                                                                                                                                                     | [1]        |
| 3 | <p>The age-stage-specific 10-year survival can be approximated to the age-specific 10-year survival adjusted for the ratio of 5-year stage-specific survival.</p> <p><b>Justification:</b> Since cure rates for most cancers are only known 5-10 years post-diagnosis, we wanted to use 10-year stage-specific survival data in our calculations. NCRAS only routinely generated stage-specific survival from 2013. Hence, to obtain stage-specific 10-year survival, we applied established methods of applying the ratio of stage-specific to all stage survival at 5 years to all-stage survival at 10-years.</p> <p><b>Notes:</b> For brain cancers, all tumours are included as Staging as 1-4 is not performed.</p>                                                                                                                                                                                                                                                                                                                                                                                                                                                                                                                                                                                                                                                                                                                                                                                                                                                                                                                                                                                                                                                                                                                                                                                                                                                                                                                                                                                                                                                                                                                                                                                                                                                                                                                                                                                                               | [2]        |
| 4 | <p>Cancer survival estimates are well reflected by the sex-average for all cancer types except for prostate, testicular, endometrial, ovarian, cervical and breast cancers.</p>                                                                                                                                                                                                                                                                                                                                                                                                                                                                                                                                                                                                                                                                                                                                                                                                                                                                                                                                                                                                                                                                                                                                                                                                                                                                                                                                                                                                                                                                                                                                                                                                                                                                                                                                                                                                                                                                                                                                                                                                                                                                                                                                                                                                                                                                                                                                                         | [1]        |
| 5 | <p>Life expectancy is that for the mid-age of the age-band, averaged for both sexes. For those age 80+, average life expectancy is that of the midpoint of age 80-90 band. Those who succumb to their cancer are not ascribed any life-years gained.</p>                                                                                                                                                                                                                                                                                                                                                                                                                                                                                                                                                                                                                                                                                                                                                                                                                                                                                                                                                                                                                                                                                                                                                                                                                                                                                                                                                                                                                                                                                                                                                                                                                                                                                                                                                                                                                                                                                                                                                                                                                                                                                                                                                                                                                                                                                | [3]        |
| 6 | <p>All patients &lt;60 years for Stage 1-3 disease have treatment with curative intent (definitive treatment). The stage-specific ratio of definitive treatment [major resection: other] in those &gt;60 years is uniform across age groups and is the average of that in age groups &lt;60.</p>                                                                                                                                                                                                                                                                                                                                                                                                                                                                                                                                                                                                                                                                                                                                                                                                                                                                                                                                                                                                                                                                                                                                                                                                                                                                                                                                                                                                                                                                                                                                                                                                                                                                                                                                                                                                                                                                                                                                                                                                                                                                                                                                                                                                                                        |            |
| 7 | <p>The impact of systemic pathway delays consequent from COVID-19-related disruption can be modelled from observational studies in which long-term survival has been correlated with different durations of delay to treatment.</p> <p><b>Justification:</b> Experimentally-derived estimates to quantify the impact of delay on survival would have constituted the optimal type of evidence to inform assumptions in the model, but those do not exist as randomised trials comparing non-delayed versus dramatically delayed surgery would be clearly unethical. Although there is a multitude of mathematical models of cancer growth and spread, it remains unclear how faithfully these model correspond to surgical intervention, clinical staging, metastasis and outcome.</p> <p>We reviewed the literature to identify studies of delay in treatment for which: (i) there was follow up for <math>\geq 5</math> years comprising either hazard ratios or % survival, (ii) longer durations of delay, (ii) long-term follow-up to evaluate the impact on long-term survival (<math>\geq 5</math> years) (iii) stage-specific data enabling partition of stage 1-3 from stage 4. We restricted the analysis to tumour types for which multiple survival comparisons were available and multiple stages were included. We identified 11 suitable studies relating to colorectal cancer, breast cancer and bladder cancer.</p> <p>Although the majority of these studies are based on crude survival (<i>i.e.</i> all-cause) rather than net (<i>i.e.</i> cancer-specific), because they have been used to derive ratios in survival between groups experiencing different delays, we assume the effects due to background mortality rates are largely 'cancelled out' in the ratio.</p>                                                                                                                                                                                                                                                                                                                                                                                                                                                                                                                                                                                                                                                                                                                                          | [4-12]     |
| 8 | <p>Survival decrement due to delay can be modelled as a constant hazard ratio (delay-HR) applied across the subsequent 10 years.</p> <p><b>Justification:</b></p> <p>Whilst this likely oversimplifies the temporal, spatial and tumour-type specific patterns of cancer progression, the observational data available are insufficient to afford a more intricate model than a linear regression.</p> <p><b>Notes:</b></p> <p>Observational studies did not present trend HRs, so we estimated by linear regression a per-day HR, using the median delay associated with each HR, or if medians were not presented we used the mid-point, except for the first (baseline) group where we assumed the median occurred at 2/3 the width of the interval (which was consistent with studies that reported a median and interval), and for the last open-ended group we assumed the median occurred at the lower boundary plus half the width of the previous strata.</p> <p>This per-day delay-HR is applied to the underlying NCRAS 10-year survival as follows:</p> <ul style="list-style-type: none"> <li>• <math>\text{Per\_year\_Hazard\_Rate\_under\_standard\_conditions} = -\text{LN}(100\% - (100\% - (10\text{-year\_survival}))) / 10</math></li> <li>• <math>\text{Delay-HR\_for\_specified\_period\_of\_delay} = \text{EXP}(\text{number\_of\_days\_delay} * \text{per\_day\_delay-HR})</math></li> <li>• <math>\text{Per\_year\_Hazard\_Rate\_POST-DELAY} = \text{Per\_year\_Hazard\_Rate\_under\_standard\_conditions} * \text{Delay-HR\_for\_specified\_period\_of\_delay}</math></li> <li>• <math>10\text{-year\_fatality\_POST-DELAY} = (1 - \text{EXP}(-1 * \text{Per\_year\_Hazard\_Rate\_POST-DELAY} * 10))</math></li> <li>• <math>10\text{-year\_survival\_POST-DELAY} = 100\% - 10\text{-year\_fatality\_POST-DELAY}</math></li> <li>• <math>10\text{-year\_survival\_CURRENT\_COVID-ADJUSTED} = 10\text{-year\_survival\_STANDARD} * (100\% - \text{likelihood\_of\_per-surgical\_COVID\_death}) * (100\% - \text{likelihood\_of\_community\_COVID\_death})</math></li> <li>• <math>10\text{-year\_survival\_POST-DELAY\_COVID-ADJUSTED} = 10\text{-year\_survival\_POST-DELAY} * (100\% - \text{likelihood\_of\_per-surgical\_COVID\_death}) * (100\% - \text{likelihood\_of\_community\_COVID\_death})</math></li> <li>• <math>\text{average\%delay-related\_survival\_reduction} = 10\text{-year\_survival\_CURRENT\_COVID-ADJUSTED} - 10\text{-year\_survival\_POST-DELAY\_COVID-ADJUSTED}</math></li> </ul> | [13]       |

|                                                      |                                                                                                                                                                                                                                                                                                                                                                                                                                                                                                                                                                                                                                                                                                                                                                                                                                                                                                                                                                                                                                                                                                                                                                                                                                                                                                                                                                                                                                                                                                                                                                                      |          |
|------------------------------------------------------|--------------------------------------------------------------------------------------------------------------------------------------------------------------------------------------------------------------------------------------------------------------------------------------------------------------------------------------------------------------------------------------------------------------------------------------------------------------------------------------------------------------------------------------------------------------------------------------------------------------------------------------------------------------------------------------------------------------------------------------------------------------------------------------------------------------------------------------------------------------------------------------------------------------------------------------------------------------------------------------------------------------------------------------------------------------------------------------------------------------------------------------------------------------------------------------------------------------------------------------------------------------------------------------------------------------------------------------------------------------------------------------------------------------------------------------------------------------------------------------------------------------------------------------------------------------------------------------|----------|
| 9                                                    | <p>The ‘delay-HRs’ capture tumour progression that is applicable more broadly by category for tumours of low, medium and high progressiveness,</p> <p><b>Justification:</b></p> <p>Our useable observational studies from 3 tumour types reveal clear differences between breast cancer compared to colorectal and bladder cancers. There are no relevant observational data available for the majority of tumour types, in particular those of poor outcomes.</p> <p>We classified cancers as being of low (5-year survival &gt;90%), moderate (90-50%) or high (&lt;50%) progressiveness based on 5-year survival.</p> <p>We calculated a weighted average for the HR per day delay in treatment (the ‘delay-HR’) based on the number of patients in each study for (i) breast cancer (ii) colorectal and bladder cancer. We apply the per-day delay-HR from breast cancer to tumours of low progressiveness, and the weighted average for bladder and colorectal for tumours of moderate progressiveness. Because we have no observational data upon which to base a per-day hazard ratio for high progressiveness tumours (e.g. oesophageal, gastric), we use the same delay-HR from the moderate group; this is likely to be a conservative assumption.</p> <p>The 5-year survival metric used as a proxy for overall tumour aggressiveness/progressiveness is that for Stage 2 disease as this approach (i) excludes the indolent entities which may be included in stage 1 and (ii) disregards artefactual bias of the distribution of asymmetric stage-at-ascertainment.</p> | [1]      |
| 10                                                   | <p>The per-day ‘delay-HR’ for tumour progression is independent of disease stage.</p> <p><b>Justification:</b> Review of reported observational studies revealed no evidence of inter-stage heterogeneity on per-day delay-HRs.</p>                                                                                                                                                                                                                                                                                                                                                                                                                                                                                                                                                                                                                                                                                                                                                                                                                                                                                                                                                                                                                                                                                                                                                                                                                                                                                                                                                  | [4-12]   |
| 11                                                   | <p>There are no impact additional impacts on treatment outcomes consequent from COVID19-related short-staffing, under-experienced, or redeployed staff.</p>                                                                                                                                                                                                                                                                                                                                                                                                                                                                                                                                                                                                                                                                                                                                                                                                                                                                                                                                                                                                                                                                                                                                                                                                                                                                                                                                                                                                                          |          |
| <b>Cancer diagnosis</b>                              |                                                                                                                                                                                                                                                                                                                                                                                                                                                                                                                                                                                                                                                                                                                                                                                                                                                                                                                                                                                                                                                                                                                                                                                                                                                                                                                                                                                                                                                                                                                                                                                      |          |
| 12                                                   | <p>The diagnostic-conversion-rate is uniform across tumour-types within a tumour-referral-group, and uniform across age groups</p> <p><b>Justification:</b> data are not available specifying the diagnostic-conversion-rate by age- group and/or tumour-type specific referral category.</p>                                                                                                                                                                                                                                                                                                                                                                                                                                                                                                                                                                                                                                                                                                                                                                                                                                                                                                                                                                                                                                                                                                                                                                                                                                                                                        |          |
| 13                                                   | <p>There is no impact of delay to survival on cancers diagnosed via 2WW referral that are outside of the tumour-referral-group.</p> <p><b>Justification:</b> data are not available specifying the details of the cancer diagnoses made outside of the tumour-referral-group, nor the stage at which they are diagnosed.</p>                                                                                                                                                                                                                                                                                                                                                                                                                                                                                                                                                                                                                                                                                                                                                                                                                                                                                                                                                                                                                                                                                                                                                                                                                                                         |          |
| 14                                                   | <p>Cancer investigations with negative results ordered directly by GPs do not impact on resource availability for 2WW investigatory referral.</p> <p><b>Justification:</b> There is wide variation across primary care in the availability of direct access to first-line investigations, for example, USS for symptoms of gynaecological cancer and CT for symptoms of pancreatic cancer. Although they compete for the same resources, negative cases are not accounted for in routes-to-diagnosis datasets</p>                                                                                                                                                                                                                                                                                                                                                                                                                                                                                                                                                                                                                                                                                                                                                                                                                                                                                                                                                                                                                                                                    |          |
| 15                                                   | <p>The risk of death associated with technical complications from specific invasive investigatory procedures is the product of the risk of complication and the fatality associated with the complication (Supplementary Table 11), for example colonic preformation. This is uniform across age groups.</p>                                                                                                                                                                                                                                                                                                                                                                                                                                                                                                                                                                                                                                                                                                                                                                                                                                                                                                                                                                                                                                                                                                                                                                                                                                                                         | [14-17]  |
| <b>COVID-19-related mortality in cancer patients</b> |                                                                                                                                                                                                                                                                                                                                                                                                                                                                                                                                                                                                                                                                                                                                                                                                                                                                                                                                                                                                                                                                                                                                                                                                                                                                                                                                                                                                                                                                                                                                                                                      |          |
| 16                                                   | <p>Likelihood of nosocomial COVID-19 infection is a function of a per-day rate of infection of 2% that is stable and uniform across healthcare facilities.</p> <p><b>Justification:</b> There have been multiple reports of high rates of nosocomial infection [18, 19] and high rates of infection amongst healthcare workers. Healthcare workers acquire immunity but the prevalence of infection in the community will fluctuate, so nosocomial infection rates will likely be dynamic [20]. To date, there has been no published per-day rate of infection in a hospital setting. We examined in our sensitivity analysis, daily nosocomial infection rates of 1%, 2%, 5% and 10%. In our sensitivity analysis, variation in the rate of nosocomial infection displays an inverse relationship with the impact of delay on survival i.e. the higher risk of nosocomial infection cancels out the health benefit of non-delay (Supplementary Table 2). Following estimate of infection rate of 1-2% per day from unpublished clinical data from a UK surgical oncology centre, as our default, we used an estimate of 2%, which may be conservatively high.</p>                                                                                                                                                                                                                                                                                                                                                                                                                   | [18-22]  |
| 17                                                   | <p>Mortality from nosocomial COVID-19 is at rates equivalent to those reported in Wuhan for 44,672 molecularly-confirmed COVID-19 cases for patients acquiring infection nosocomially at surgery.</p> <p><b>Justification:</b> The best UK data currently available capturing case fatality rates are from a UK series of 20,133 hospitalised COVID-19 patients (Docherty et al. 2020). However, these case fatality rates pertain only to hospitalised (severe) COVID-19 cases, not all-comers. Current CFR estimates from Lombardy/elsewhere in Europe are also for hospital cases only. Therefore, acknowledging that mild/asymptomatic individuals are still likely under-represented in the Wuhan dataset of 44,672 molecularly-confirmed COVID-19 cases, these data currently represent the most comprehensive and largest dataset from which to estimate a CFR for all-comers with COVID-19.</p>                                                                                                                                                                                                                                                                                                                                                                                                                                                                                                                                                                                                                                                                              | [23, 24] |
| 18                                                   | <p>Stage 1-3 patients cured of their disease are at a cancer-related elevation of <i>fatality</i> from community-acquired COVID-19 mortality for 1-year post-diagnosis and the elevation is a standard ‘multiplier’ of 2. They are not at elevated risk of <i>contracting</i> COVID-19 outside of their peri-surgical period.</p> <p><b>Justification:</b> We hypothesise that the main contributors to the cancer-related elevation of case fatality rates would be from progressive metastatic disease and therapy thereof. However, we hypothesise that, following their peri-surgical exposure to nosocomial infection, those who achieve cure from Stage 1-3 disease (the subjects of our analysis) would experience some immunocompromise from surgery, SACT (systemic anti-cancer therapy) and/or radical radiotherapy but primarily in the first year of treatment. The estimates for elevation in case fatality rates due to cancer vary widely, with little detail of the heterogeneity of the ‘cancer population’ to which refer. UK data suggested a RR of 1.19, which is much lower than that estimated in China or Italy (RR&gt;5). We used a low-intermediate RR estimate of 2 to reflect a likely lower risk sub-population of cancer patients, but undertook sensitivity testing for a higher value of 5.</p>                                                                                                                                                                                                                                                       | [23-26]  |
| 19                                                   | <p>The cancer-related elevation of risk of community-acquired COVID-19 mortality is predicated on the risk of community COVID-19 infection in the year following definitive treatment of 20%.</p> <p><b>Justification:</b> The likelihood of infection is highly unpredictable and depends on the local and national prevalence of community infection. Initially, PHE considered community infection rates of up to 80%. We examined in our sensitivity analysis, community infection rates of 5%, 20% and 50%. These have a modest <i>inversely related</i> effect on the impact of the delay. As our default, we used an estimate of 20%, which may be conservatively high.</p>                                                                                                                                                                                                                                                                                                                                                                                                                                                                                                                                                                                                                                                                                                                                                                                                                                                                                                   | [27]     |

| <b>Cancer Therapy</b> |                                                                                                                                                                                                                                                                                                                                                                                                                                                                                                          |      |
|-----------------------|----------------------------------------------------------------------------------------------------------------------------------------------------------------------------------------------------------------------------------------------------------------------------------------------------------------------------------------------------------------------------------------------------------------------------------------------------------------------------------------------------------|------|
| 20                    | All patients with a given tumour stage have a single standard open operation. ICU stay and ward stay are standard for a given operation as per the median of values from 3 large surgical oncology centres. In regard of nosocomial exposure, day-case surgery is counted as a half-day of hospital admission. For a specified tumour stage, the duration of inpatient stay is equivalent for surgical and non-surgical definitive treatments (for example radicle radiotherapy versus major resection). | [28] |
| 21                    | Adjuvant chemo-radiotherapy is continued using standard/modified protocols, as per clinical judgment. The additional specific risk of nosocomial infection from these treatments is encompassed in 1 year of cancer-related elevation of case fatality rates.                                                                                                                                                                                                                                            |      |

**Supplementary Table 2: Route to cancer diagnosis with distribution by age and stage.**

Data from NHS England Clinical Commissioning Groups (2013-2016). 2WW, two week wait."

| Tumour Type | Tumour Referral Group     | Route     | Proportion by route | Proportion by age group |        |        |        |        |        | Proportion by stage |        |        |        |        | Conversion to cancer |                                   | Cancer diagnoses per year total |
|-------------|---------------------------|-----------|---------------------|-------------------------|--------|--------|--------|--------|--------|---------------------|--------|--------|--------|--------|----------------------|-----------------------------------|---------------------------------|
|             |                           |           |                     | 30-39                   | 40-49  | 50-59  | 60-69  | 70-79  | 80+    | 1                   | 2      | 3      | 4      | st1-3  | % Cancer diagnosis   | % Cancer in Tumour Referral Group |                                 |
| Bladder     | Urology (exc. Testicular) | 2WW       | 42.9%               | 0.32%                   | 2.10%  | 7.36%  | 23.40% | 36.24% | 30.58% | 51.92%              | 29.09% | 6.74%  | 12.26% | 87.74% | 16.90%               | 98.20%                            | 8,524                           |
|             |                           | Emergency | 18.0%               | 0.6%                    | 1.5%   | 3.9%   | 12.9%  | 26.5%  | 54.6%  | 23.02%              | 30.21% | 9.43%  | 37.35% | 62.65% |                      |                                   |                                 |
|             |                           | Routine   | 39.1%               | 0.45%                   | 2.02%  | 6.31%  | 19.57% | 34.55% | 37.10% | 51.51%              | 25.95% | 6.99%  | 15.55% | 84.45% |                      |                                   |                                 |
| Brain       | Brain                     | 2WW       | 1.73%               | 8.72%                   | 8.39%  | 16.44% | 31.21% | 25.17% | 10.07% |                     |        |        |        |        | 1.00%                | 100.00%                           | 8,102                           |
|             |                           | Emergency | 44.56%              | 15.35%                  | 7.63%  | 13.49% | 20.60% | 22.92% | 20.00% |                     |        |        |        |        |                      |                                   |                                 |
|             |                           | Routine   | 53.72%              | 20.1%                   | 11.8%  | 16.9%  | 25.6%  | 19.5%  | 6.2%   |                     |        |        |        |        |                      |                                   |                                 |
| Breast      | Breast                    | 2WW       | 54.20%              | 6.10%                   | 19.14% | 16.22% | 16.25% | 20.53% | 21.76% | 31.22%              | 50.86% | 12.97% | 4.95%  | 95.05% | 4.90%                | 99.30%                            | 41,845                          |
|             |                           | Screening | 29.46%              | 0.03%                   | 5.38%  | 33.16% | 45.87% | 14.24% | 1.31%  | 68.19%              | 27.02% | 3.90%  | 0.89%  | 99.11% |                      |                                   |                                 |
|             |                           | Emergency | 4.01%               | 1.93%                   | 5.72%  | 8.90%  | 12.40% | 21.06% | 50.00% | 17.47%              | 24.45% | 10.36% | 47.71% | 52.29% |                      |                                   |                                 |
|             |                           | Routine   | 12.34%              | 6.36%                   | 19.59% | 19.72% | 19.68% | 17.78% | 16.88% | 44.27%              | 36.57% | 8.95%  | 10.22% | 89.78% | 1.30%                | 96.20%                            |                                 |
| Cervix      | Gynaecology               | 2WW       | 22.12%              | 16.55%                  | 15.84% | 18.12% | 19.74% | 17.32% | 12.43% | 29.29%              | 40.12% | 14.97% | 15.62% | 84.38% | 3.10%                | 97.40%                            | 2,128                           |
|             |                           | Screening | 34.03%              | 63.75%                  | 22.66% | 9.97%  | 3.56%  | 0.06%  |        | 90.36%              | 7.24%  | 1.48%  | 0.91%  | 99.09% |                      |                                   |                                 |
|             |                           | Emergency | 9.57%               | 18.05%                  | 13.80% | 14.63% | 16.60% | 18.26% | 18.67% | 11.15%              | 21.19% | 21.35% | 46.31% | 53.69% |                      |                                   |                                 |
|             |                           | Routine   | 34.28%              | 44.59%                  | 22.09% | 12.71% | 8.31%  | 6.49%  | 5.82%  | 67.35%              | 17.93% | 6.68%  | 8.04%  | 91.96% |                      |                                   |                                 |
| Colorectal  | Lower GI                  | 2WW       | 32.20%              | 0.84%                   | 3.13%  | 13.04% | 21.54% | 32.98% | 28.47% | 15.37%              | 28.20% | 32.52% | 23.90% | 76.10% | 2.80%                | 78.40%                            | 32,979                          |
|             |                           | Screening | 9.79%               |                         |        | 0.63%  | 62.47% | 35.67% | 1.23%  | 36.88%              | 25.96% | 29.15% | 8.01%  | 91.99% |                      |                                   |                                 |
|             |                           | Emergency | 24.19%              | 4.77%                   | 4.17%  | 9.12%  | 15.91% | 24.45% | 41.58% | 7.03%               | 24.97% | 26.00% | 41.99% | 58.01% |                      |                                   |                                 |
|             |                           | Routine   | 33.81%              | 2.88%                   | 4.87%  | 13.72% | 19.08% | 30.18% | 29.27% | 22.63%              | 26.03% | 28.33% | 23.02% | 76.98% |                      |                                   |                                 |
| Kidney      | Urology (exc. Testicular) | 2WW       | 28.06%              | 2.29%                   | 8.14%  | 17.67% | 27.75% | 27.47% | 16.68% | 45.25%              | 11.40% | 21.75% | 21.60% | 78.40% | 16.90%               | 98.20%                            | 8,764                           |
|             |                           | Emergency | 22.09%              | 3.60%                   | 5.52%  | 11.00% | 19.25% | 24.10% | 36.54% | 33.09%              | 7.10%  | 13.42% | 46.39% | 53.61% |                      |                                   |                                 |
|             |                           | Routine   | 49.86%              | 3.79%                   | 8.11%  | 17.05% | 28.32% | 27.60% | 15.12% | 54.59%              | 8.66%  | 18.03% | 18.71% | 81.29% |                      |                                   |                                 |
| Larynx      | Head & Neck               | 2WW       | 47.98%              | 0.49%                   | 5.17%  | 19.35% | 33.30% | 28.25% | 13.43% | 36.59%              | 19.35% | 17.76% | 26.31% | 73.69% | 2.90%                | 74.00%                            | 1,850                           |
|             |                           | Emergency | 10.05%              | 1.24%                   | 4.14%  | 13.79% | 29.24% | 28.00% | 23.59% | 5.44%               | 6.60%  | 19.61% | 68.35% | 31.65% |                      |                                   |                                 |
|             |                           | Routine   | 41.98%              | 1.32%                   | 4.75%  | 15.91% | 31.43% | 30.37% | 16.21% | 39.97%              | 19.00% | 18.27% | 22.76% | 77.24% |                      |                                   |                                 |
| Liver       | Upper GI                  | 2WW       | 14.50%              | 0.74%                   | 1.86%  | 10.09% | 25.21% | 34.34% | 27.75% | 7.63%               | 10.65% | 15.61% | 66.12% | 33.88% | 5.70%                | 85.90%                            | 4,712                           |
|             |                           | Emergency | 42.68%              | 1.77%                   | 2.71%  | 9.68%  | 20.66% | 27.73% | 37.45% | 7.73%               | 9.14%  | 11.90% | 71.23% | 28.77% |                      |                                   |                                 |
|             |                           | Routine   | 42.82%              | 2.20%                   | 4.29%  | 14.57% | 27.34% | 32.09% | 19.52% | 17.86%              | 21.06% | 14.18% | 46.90% | 53.10% |                      |                                   |                                 |
| Lung        | Lung                      | 2WW       | 28.21%              | 0.27%                   | 2.19%  | 10.22% | 30.21% | 35.77% | 21.34% | 15.39%              | 9.90%  | 27.93% | 46.78% | 53.22% | 10.90%               | 93.70%                            | 36,668                          |
|             |                           | Emergency | 34.73%              | 0.35%                   | 1.90%  | 7.56%  | 20.89% | 32.17% | 37.13% | 9.32%               | 4.71%  | 14.43% | 71.54% | 28.46% |                      |                                   |                                 |
|             |                           | Routine   | 37.06%              | 0.54%                   | 2.13%  | 9.82%  | 27.90% | 37.01% | 22.60% | 26.57%              | 10.00% | 21.71% | 41.71% | 58.29% |                      |                                   |                                 |
| Melanoma    | Skin                      | 2WW       | 63.10%              | 10.44%                  | 14.18% | 17.82% | 23.00% | 20.31% | 14.25% | 71.49%              | 20.45% | 6.46%  | 1.60%  | 98.40% | 4.40%                | 98.10%                            | 12,110                          |
|             |                           | Emergency | 2.07%               | 5.62%                   | 5.91%  | 10.54% | 18.52% | 24.04% | 35.37% | 46.45%              | 21.69% | 9.07%  | 22.79% | 77.21% |                      |                                   |                                 |
|             |                           | Routine   | 34.83%              | 9.37%                   | 9.77%  | 13.32% | 20.73% | 24.64% | 22.17% | 69.82%              | 20.82% | 6.21%  | 3.16%  | 96.84% |                      |                                   |                                 |
| Oesophagus  | Upper GI                  | 2WW       | 44.95%              | 0.37%                   | 2.98%  | 12.86% | 28.97% | 31.01% | 23.81% | 7.37%               | 16.10% | 41.20% | 35.33% | 64.67% | 5.70%                | 85.90%                            | 7,427                           |
|             |                           | Emergency | 19.91%              | 0.57%                   | 2.24%  | 8.74%  | 19.52% | 27.15% | 41.78% | 7.22%               | 12.37% | 27.08% | 53.33% | 46.67% |                      |                                   |                                 |
|             |                           | Routine   | 35.14%              | 0.60%                   | 3.02%  | 13.02% | 29.56% | 32.43% | 21.38% | 20.66%              | 16.47% | 33.92% | 28.95% | 71.05% |                      |                                   |                                 |

|             |                           |           |        |        |        |        |        |        |        |        |        |        |        |        |        |        |        |
|-------------|---------------------------|-----------|--------|--------|--------|--------|--------|--------|--------|--------|--------|--------|--------|--------|--------|--------|--------|
| Oral cavity | Head & Neck               | 2WW       | 44.14% | 2.93%  | 9.66%  | 22.36% | 29.43% | 20.87% | 14.76% | 27.27% | 15.79% | 10.40% | 46.54% | 53.46% | 2.90%  | 74.00% | 2,629  |
|             |                           | Emergency | 4.77%  | 3.25%  | 8.52%  | 18.86% | 22.52% | 23.53% | 23.33% | 13.85% | 8.82%  | 8.06%  | 69.27% | 30.73% |        |        |        |
|             |                           | Routine   | 51.08% | 3.49%  | 8.21%  | 20.53% | 28.64% | 22.20% | 16.93% | 37.03% | 13.39% | 8.23%  | 41.36% | 58.64% |        |        |        |
| Oropharynx  | Head & Neck               | 2WW       | 58.86% | 1.35%  | 12.10% | 34.70% | 33.82% | 14.18% | 3.84%  | 2.84%  | 6.10%  | 13.42% | 77.65% | 22.35% | 2.90%  | 74.00% | 2,905  |
|             |                           | Emergency | 6.30%  | 2.06%  | 9.34%  | 28.32% | 31.96% | 19.94% | 8.39%  | 3.17%  | 5.74%  | 10.10% | 80.99% | 19.01% |        |        |        |
|             |                           | Routine   | 34.84% | 1.46%  | 11.95% | 33.23% | 32.66% | 15.67% | 5.03%  | 6.51%  | 8.89%  | 14.61% | 69.98% | 30.02% |        |        |        |
| Ovary       | Gynaecology               | 2WW       | 33.49% | 4.20%  | 8.42%  | 20.97% | 28.94% | 25.44% | 12.03% | 31.94% | 7.81%  | 41.66% | 18.59% | 81.41% | 3.10%  | 97.40% | 6,398  |
|             |                           | Emergency | 28.03% | 6.86%  | 7.36%  | 12.16% | 19.96% | 25.38% | 28.29% | 15.72% | 3.20%  | 42.44% | 38.64% | 61.36% |        |        |        |
|             |                           | Routine   | 38.48% | 13.01% | 13.53% | 18.81% | 22.22% | 19.54% | 12.89% | 51.11% | 6.48%  | 27.67% | 14.74% | 85.26% |        |        |        |
| Pancreas    | Upper GI                  | 2WW       | 19.29% | 0.24%  | 2.10%  | 9.44%  | 26.04% | 36.07% | 26.09% | 5.79%  | 14.72% | 13.72% | 65.77% | 34.23% | 5.70%  | 85.90% | 8,260  |
|             |                           | Emergency | 46.13% | 0.62%  | 2.42%  | 8.34%  | 18.71% | 29.72% | 40.20% | 6.21%  | 11.57% | 8.32%  | 73.90% | 26.10% |        |        |        |
|             |                           | Routine   | 34.58% | 1.31%  | 4.05%  | 11.79% | 27.96% | 32.31% | 22.58% | 8.14%  | 18.71% | 12.35% | 60.80% | 39.20% |        |        |        |
| Prostate    | Urology (exc. Testicular) | 2WW       | 47.20% | 0.01%  | 0.94%  | 9.63%  | 32.95% | 38.22% | 18.24% | 27.95% | 21.59% | 25.96% | 24.50% | 75.50% | 16.90% | 98.20% | 40,834 |
|             |                           | Emergency | 7.82%  | 0.04%  | 0.43%  | 4.26%  | 16.52% | 28.84% | 49.91% | 17.43% | 7.92%  | 9.40%  | 65.25% | 34.75% |        |        |        |
|             |                           | Routine   | 44.99% | 0.02%  | 1.26%  | 11.83% | 36.53% | 35.77% | 14.59% | 43.50% | 25.13% | 19.23% | 12.14% | 87.86% |        |        |        |
| Stomach     | Upper GI                  | 2WW       | 31.03% | 0.37%  | 2.98%  | 12.86% | 28.97% | 31.01% | 23.81% | 8.26%  | 18.47% | 27.16% | 46.11% | 53.89% | 5.70%  | 85.90% | 5,332  |
|             |                           | Emergency | 31.65% | 1.91%  | 3.20%  | 7.66%  | 13.97% | 26.96% | 46.31% | 7.44%  | 14.78% | 15.77% | 62.02% | 37.98% |        |        |        |
|             |                           | Routine   | 37.33% | 1.96%  | 4.93%  | 10.50% | 20.45% | 32.98% | 29.18% | 20.14% | 20.58% | 21.86% | 37.42% | 62.58% |        |        |        |
| Testis      | Testis                    | 2WW       | 61.21% | 61.68% | 22.44% | 10.93% | 3.42%  | 1.17%  | 0.37%  | 86.62% | 7.82%  | 3.08%  | 2.48%  | 97.52% | 9.00%  | 75.00% | 1,355  |
|             |                           | Emergency | 9.11%  | 65.41% | 19.04% | 7.99%  | 3.05%  | 2.62%  | 1.89%  | 52.88% | 12.33% | 17.30% | 17.50% | 82.50% |        |        |        |
|             |                           | Routine   | 29.68% | 60.87% | 19.86% | 11.16% | 5.22%  | 1.92%  | 0.98%  | 81.75% | 8.24%  | 5.56%  | 4.46%  | 95.54% |        |        |        |
| Thyroid     | Head & Neck               | 2WW       | 23.20% | 28.27% | 19.01% | 18.14% | 15.08% | 12.24% | 7.26%  | 44.39% | 9.96%  | 18.97% | 26.67% | 73.33% | 2.90%  | 74.00% | 2,673  |
|             |                           | Emergency | 6.36%  | 11.86% | 9.79%  | 12.55% | 18.76% | 19.45% | 27.59% | 31.41% | 7.67%  | 10.55% | 50.36% | 49.64% |        |        |        |
|             |                           | Routine   | 70.44% | 27.79% | 21.33% | 20.17% | 15.95% | 10.21% | 4.56%  | 58.67% | 11.17% | 17.02% | 13.15% | 86.85% |        |        |        |
| Uterus      | Gynaecology               | 2WW       | 57.73% | 0.24%  | 2.28%  | 19.08% | 35.80% | 29.16% | 13.44% | 75.67% | 7.47%  | 11.00% | 5.86%  | 94.14% | 3.10%  | 97.40% | 7,604  |
|             |                           | Emergency | 7.61%  | 1.63%  | 6.45%  | 13.74% | 19.75% | 25.59% | 32.83% | 42.18% | 7.50%  | 20.01% | 30.31% | 69.69% |        |        |        |
|             |                           | Routine   | 34.66% | 2.82%  | 10.05% | 23.45% | 26.99% | 22.78% | 13.91% | 75.70% | 7.36%  | 10.54% | 6.41%  | 93.59% |        |        |        |

**Supplementary Table 3 - Impact on 10-year net survival of differing periods of diagnostic delay to cancer treatment**

20 common cancer types.

| Tumour Type                          | 2 month delay |        |        |        |        |        | 4 month delay |        |        |        |        |        | 6 month delay |        |        |        |        |        |
|--------------------------------------|---------------|--------|--------|--------|--------|--------|---------------|--------|--------|--------|--------|--------|---------------|--------|--------|--------|--------|--------|
|                                      | 30-39         | 40-49  | 50-59  | 60-69  | 70-79  | 80+    | 30-39         | 40-49  | 50-59  | 60-69  | 70-79  | 80+    | 30-39         | 40-49  | 50-59  | 60-69  | 70-79  | 80+    |
| Bladder                              | 10.11%        | 9.53%  | 9.08%  | 9.91%  | 11.18% | 11.62% | 21.78%        | 20.75% | 19.91% | 21.37% | 23.19% | 21.91% | 34.24%        | 33.07% | 32.01% | 33.62% | 34.77% | 29.48% |
| Brain (all)                          | 7.38%         | 8.98%  | 11.64% | 12.27% | 11.53% | 11.44% | 16.59%        | 19.73% | 24.04% | 23.83% | 21.06% | 21.41% | 27.56%        | 31.82% | 35.84% | 33.11% | 27.44% | 28.59% |
| Breast (all hormone marker statuses) | 3.14%         | 2.09%  | 1.59%  | 1.36%  | 2.38%  | 5.02%  | 6.75%         | 4.53%  | 3.47%  | 2.98%  | 5.15%  | 10.50% | 10.86%        | 7.38%  | 5.67%  | 4.87%  | 8.34%  | 16.38% |
| Cervix                               | 3.44%         | 5.62%  | 7.67%  | 10.08% | 12.01% | 10.88% | 8.06%         | 12.89% | 17.19% | 21.67% | 23.68% | 19.43% | 14.15%        | 21.99% | 28.38% | 33.95% | 33.45% | 24.77% |
| Colorectal                           | 6.38%         | 7.13%  | 6.77%  | 6.63%  | 8.29%  | 10.65% | 14.53%        | 16.08% | 15.33% | 15.02% | 18.33% | 22.17% | 24.51%        | 26.82% | 25.70% | 25.20% | 29.76% | 33.41% |
| Kidney                               | 3.08%         | 4.01%  | 5.30%  | 6.59%  | 8.29%  | 11.59% | 7.24%         | 9.35%  | 12.20% | 14.94% | 18.32% | 23.00% | 12.76%        | 16.30% | 20.90% | 25.08% | 29.77% | 32.73% |
| Larynx                               | 6.93%         | 9.07%  | 8.51%  | 9.53%  | 10.21% | 11.02% | 15.67%        | 19.91% | 18.83% | 20.71% | 21.75% | 22.54% | 26.22%        | 32.04% | 30.62% | 32.87% | 33.69% | 33.26% |
| Liver                                | 11.66%        | 11.97% | 11.37% | 10.48% | 8.74%  | 10.45% | 20.92%        | 21.90% | 20.17% | 18.00% | 14.20% | 18.33% | 26.79%        | 28.56% | 25.56% | 22.13% | 16.67% | 22.97% |
| Lung                                 | 10.90%        | 12.41% | 11.71% | 10.89% | 8.67%  | 5.23%  | 23.07%        | 23.62% | 21.15% | 19.02% | 14.05% | 7.58%  | 35.45%        | 32.11% | 27.25% | 23.75% | 16.47% | 8.25%  |
| Melanoma of skin                     | 1.92%         | 2.43%  | 3.01%  | 3.49%  | 4.53%  | 7.94%  | 4.55%         | 5.74%  | 7.07%  | 8.16%  | 10.50% | 17.59% | 8.13%         | 10.20% | 12.46% | 14.30% | 18.14% | 28.67% |
| Oesophagus                           | 11.75%        | 11.40% | 11.33% | 10.77% | 8.99%  | 3.70%  | 21.19%        | 20.21% | 20.09% | 18.75% | 14.73% | 5.06%  | 27.26%        | 25.58% | 25.43% | 23.33% | 17.42% | 5.35%  |
| Oral cavity                          | 8.09%         | 10.98% | 12.05% | 12.16% | 12.03% | 11.43% | 18.02%        | 23.18% | 24.41% | 24.18% | 23.34% | 21.23% | 29.57%        | 35.53% | 35.58% | 34.51% | 32.39% | 28.14% |
| Oropharynx                           | 7.40%         | 9.20%  | 10.82% | 12.22% | 11.75% | 9.84%  | 16.64%        | 20.16% | 22.93% | 24.13% | 21.77% | 16.80% | 27.64%        | 32.36% | 35.26% | 34.14% | 28.77% | 20.54% |
| Ovary                                | 4.48%         | 8.79%  | 11.29% | 12.23% | 11.74% | 11.04% | 10.39%        | 19.38% | 23.59% | 24.05% | 21.81% | 19.99% | 18.00%        | 31.37% | 35.71% | 33.88% | 28.90% | 25.81% |
| Pancreas                             | 9.40%         | 8.70%  | 8.92%  | 6.85%  | 5.58%  | 7.98%  | 15.43%        | 13.95% | 14.43% | 10.40% | 8.16%  | 12.71% | 18.26%        | 16.22% | 16.89% | 11.64% | 8.92%  | 14.71% |
| Prostate                             | 0.43%         | 0.43%  | 0.20%  | 0.00%  | 0.00%  | 2.36%  | 0.94%         | 0.94%  | 0.44%  | 0.00%  | 0.00%  | 5.11%  | 1.56%         | 1.56%  | 0.73%  | 0.00%  | 0.00%  | 8.28%  |
| Stomach                              | 12.45%        | 12.44% | 12.29% | 11.93% | 11.24% | 6.72%  | 24.37%        | 24.29% | 23.23% | 22.11% | 20.26% | 10.26% | 34.17%        | 33.93% | 31.34% | 29.22% | 26.05% | 11.53% |
| Testis                               | 0.37%         | 0.23%  | 0.48%  | 0.23%  | 0.40%  | 1.03%  | 0.81%         | 0.50%  | 1.06%  | 0.50%  | 0.88%  | 2.25%  | 1.34%         | 0.82%  | 1.75%  | 0.82%  | 1.46%  | 3.70%  |
| Thyroid                              | 0.07%         | 0.40%  | 0.85%  | 0.14%  | 1.64%  | 0.00%  | 0.16%         | 0.88%  | 1.86%  | 0.31%  | 3.58%  | 0.00%  | 0.26%         | 1.44%  | 3.06%  | 0.52%  | 5.84%  | 0.00%  |
| Uterus                               | 1.48%         | 3.25%  | 3.73%  | 5.39%  | 7.44%  | 9.22%  | 3.53%         | 7.62%  | 8.70%  | 12.39% | 16.66% | 19.96% | 6.34%         | 13.40% | 15.22% | 21.19% | 27.51% | 31.56% |

### Supplementary Table 4 - Impact on 10-year net survival of 3 months diagnostic delay

All diagnoses; 20 common tumour types (England 2007-2017), stratified by stage/subtype of cancer diagnosis.

Red indicates the highest tertile of survival decrement; green indicates the lowest tertile of survival decrement.

\* low confidence 5-year survival estimate for age-specific/stage-specific stratum; N/A: no cases in this age stratum.

| Tumour Type                                   | Stage | Age Group |         |        |         |         |         |
|-----------------------------------------------|-------|-----------|---------|--------|---------|---------|---------|
|                                               |       | 30-39     | 40-49   | 50-59  | 60-69   | 70-79   | 80+     |
| Bladder                                       | 1     | 9.70%*    | 10.09%  | 10.31% | 9.54%   | 7.98%   | 5.09%   |
|                                               | 2     | 18.35%*   | 17.95%  | 18.23% | 18.23%  | 17.29%  | 12.06%  |
|                                               | 3     | 18.41%*   | 18.04%* | 18.42% | 18.04%  | 16.44%  | 10.03%  |
| Breast (ER+, HER2-)                           | 1     | 1.18%     | 0.80%   | 0.35%  | 0%      | 0%      | 2.05%   |
|                                               | 2     | 4.49%     | 3.03%   | 2.90%  | 2.29%   | 2.95%   | 6.80%   |
|                                               | 3     | 8.53%     | 7.30%   | 7.94%  | 8.10%   | 8.33%   | 9.36%   |
| Breast (ER-, HER2-)                           | 1     | 3.04%     | 2.34%   | 3.19%  | 2.58%   | 2.24%   | 3.67%   |
|                                               | 2     | 6.79%     | 6.23%   | 6.20%  | 7.15%   | 8.23%   | 7.37%   |
|                                               | 3     | 10.02%*   | 10.03%  | 9.99%  | 9.83%   | 9.21%   | 8.92%*  |
| Breast (HER2+)                                | 1     | 0.43%     | 0.86%   | 1.10%  | 1.52%   | 1.67%   | 4.18%   |
|                                               | 2     | 3.66%     | 2.83%   | 2.91%  | 3.67%   | 5.04%   | 8.17%   |
|                                               | 3     | 8.57%     | 5.39%   | 7.15%  | 7.37%   | 9.30%   | 9.42%   |
| Breast (all hormone marker statuses)          | 1     | 1.65%     | 1.03%   | 0.56%  | 0.31%   | 0.03%   | 4.10%   |
|                                               | 2     | 4.87%     | 3.46%   | 3.14%  | 3.13%   | 4.54%   | 8.02%   |
|                                               | 3     | 8.90%     | 7.38%   | 7.80%  | 8.08%   | 9.38%   | 9.20%   |
| Breast (other combination of hormone markers) | 1     | 2.04%     | 1.41%   | 0.30%  | 0.43%   | 0%      | 5.25%   |
|                                               | 2     | 4.26%     | 3%      | 3.09%  | 2.96%   | 4.77%   | 8.11%   |
|                                               | 3     | 9.06%     | 7.16%   | 7.54%  | 7.56%   | 9.23%   | 9.30%   |
| Cervix                                        | 1     | 2.25%     | 3.23%   | 3.34%  | 11.33%  | 12.22%  | 12.82%* |
|                                               | 2     | 15.28%    | 16.61%  | 16.76% | 15.38%  | 17.91%  | 16.52%  |
|                                               | 3     | 17.65%*   | 16.76%* | 16.2%* | 16.16%* | 16.82%* | 15.39%* |
| Colorectal                                    | 1     | 0.75%     | 2.71%   | 2.95%  | 3.27%   | 5.26%   | 12.67%  |
|                                               | 2     | 8.17%     | 8.42%   | 7.95%  | 8.88%   | 10.90%  | 13.59%  |
|                                               | 3     | 14.31%    | 15.17%  | 14.72% | 15.05%  | 17.07%  | 16.78%  |
| Kidney                                        | 1     | 1.23%     | 2.45%   | 5.02%  | 7.74%   | 10.84%  | 17.17%  |
|                                               | 2     | 9.92%*    | 10.35%  | 7.89%  | 11.77%  | 15.06%  | 15.63%  |
|                                               | 3     | 14.65%    | 13.71%  | 15.03% | 14.95%  | 16.01%  | 17.18%  |
| Larynx                                        | 1     | 3.64%*    | 5.23%   | 10.65% | 8.81%   | 6.96%   | 10.22%  |
|                                               | 2     | 13.57%*   | 16.61%  | 12.25% | 16.28%  | 17.84%  | 17.21%  |
|                                               | 3     | 15.12%*   | 17.73%  | 17.26% | 18.26%  | 17.31%  | 17.03%* |
| Liver                                         | 1     | 18.59%*   | 18.53%* | 18.45% | 17.97%  | 15.98%  | 17.11%* |
|                                               | 2     | 17.05%*   | 17.59%* | 16.58% | 15.94%  | 14.26%  | 16.3%*  |
|                                               | 3     | 7.34%*    | 8.48%*  | 6.67%* | 6.35%   | 6.78%*  | 8.06%*  |
| Lung                                          | 1     | 3.55%     | 10.66%  | 16.55% | 17.74%  | 17.52%  | 13%     |
|                                               | 2     | 18.54%*   | 18.57%  | 18.25% | 16.75%  | 11.74%  | 5.49%   |
|                                               | 3     | 12.85%*   | 11.94%  | 9.44%  | 6.71%   | 3.54%   | 1.08%   |
| Melanoma of skin                              | 1     | 0.42%     | 1.10%   | 0.56%  | 0.19%   | 0%      | 1.16%   |
|                                               | 2     | 12.03%    | 12.40%  | 14.26% | 14.48%  | 15.28%  | 17.20%  |
|                                               | 3     | 16.97%    | 16.41%  | 17.41% | 17.64%  | 17.86%  | 17.04%  |
| Oesophagus                                    | 1     | 18.25%*   | 18.41%  | 16.71% | 17.75%  | 17.84%  | 12.87%  |
|                                               | 2     | 16.74%*   | 16.09%  | 18.05% | 16.41%  | 14.03%  | 3.85%   |
|                                               | 3     | 15.3%*    | 14.48%  | 11.74% | 11.22%  | 7.54%   | 1.52%   |
| Ovary                                         | 1     | 2.77%     | 3.93%   | 5.92%  | 5.45%   | 6.39%   | 3.26%   |
|                                               | 2     | 14.7%*    | 14.40%  | 16.07% | 15.75%  | 16.97%  | 17.42%  |
|                                               | 3     | 17.13%    | 17.77%  | 15.26% | 13.12%  | 9.95%   | 6.72%   |



|          |   |         |         |         |        |        |         |
|----------|---|---------|---------|---------|--------|--------|---------|
| Pancreas | 1 | 17.34%* | 16.72%* | 16.87%* | 16.71% | 11.35% | 14.38%* |
|          | 2 | 13.05%* | 11.95%* | 12.30%  | 9.73%  | 8.47%  | 11.96%* |
|          | 3 | 3.92%*  | 3.14%*  | 3.4%*   | 3.39%* | 3.36%* | 6.35%*  |
| Prostate | 1 | 1.06%*  | 1.06%   | 0.04%   | 0%     | 0%     | 1.89%   |
|          | 2 | 0%*     | 0%      | 0%      | 0%     | 0%     | 1.78%   |
|          | 3 | 1.34%*  | 1.34%   | 1.32%   | 0.70%  | 1.01%  | 6.75%   |
| Stomach  | 1 | 13.3%*  | 13.42%  | 15.93%  | 15.53% | 15.53% | 15.20%  |
|          | 2 | 18.35%* | 18.28%* | 18.19%  | 17.40% | 15.35% | 8.05%   |
|          | 3 | 15.12%* | 14.90%  | 15.72%  | 13.62% | 11.21% | 3.95%   |
| Testis   | 1 | 0.19%   | 0.06%   | 0.30%   | 0%     | 0%*    | 0.31%*  |
|          | 2 | 0.61%   | 1.30%   | 1.26%*  | 2.22%* | 2.22%* | N/A     |
|          | 3 | 5.46%*  | 5.7%*   | 5.56%*  | 8.13%* | 9.66%* | N/A     |
| Thyroid  | 1 | 0.05%   | 0%      | 1.18%   | 0%     | 1.38%  | 0.67%*  |
|          | 2 | 2.39%*  | 3.67%   | 0%      | 0.04%  | 1.42%  | 0.69%*  |
|          | 3 | 0.52%*  | 0.83%   | 2.35%   | 0.73%  | 3.90%  | 1.05%   |
| Uterus   | 1 | 1.34%   | 2.83%   | 3.30%   | 5.12%  | 7.08%  | 8.66%   |
|          | 2 | 9.6%*   | 8.88%   | 9.76%   | 13%    | 16.19% | 17.32%  |
|          | 3 | 16.73%* | 16.04%  | 17.82%  | 18.26% | 16.27% | 13.68%  |

Supplementary Table 5 is provided as a separate XLSX file.

**Supplementary Table 6 - Absolute survival benefit from investigatory referral.**

Absolute survival benefit describes referral (and subsequent management of cancer) versus no referral.

Per patient referred (by age group and nosocomial infection rate).

Different age groups and differing levels of nosocomial infection rates (0.5%, 1%, 2.5%, 5%) considered.

Green indicates net survival advantage for investigatory referral per referred patient; Red indicates net survival disadvantage for investigatory referral

| Nosocomial Infection Rate (for investigatory referral) | 0.50%  |        |        |        |        |        | 1%     |        |        |        |        |        | 2.50%  |        |        |        |        |        | 5%     |        |        |        |        |        |
|--------------------------------------------------------|--------|--------|--------|--------|--------|--------|--------|--------|--------|--------|--------|--------|--------|--------|--------|--------|--------|--------|--------|--------|--------|--------|--------|--------|
|                                                        | 30-39  | 40-49  | 50-59  | 60-69  | 70-79  | 80+    | 30-39  | 40-49  | 50-59  | 60-69  | 70-79  | 80+    | 30-39  | 40-49  | 50-59  | 60-69  | 70-79  | 80+    | 30-39  | 40-49  | 50-59  | 60-69  | 70-79  | 80+    |
| Age (years)                                            | 30-39  | 40-49  | 50-59  | 60-69  | 70-79  | 80+    | 30-39  | 40-49  | 50-59  | 60-69  | 70-79  | 80+    | 30-39  | 40-49  | 50-59  | 60-69  | 70-79  | 80+    | 30-39  | 40-49  | 50-59  | 60-69  | 70-79  | 80+    |
| Bladder                                                | 9.70%  | 10.10% | 10.33% | 9.57%  | 8.03%  | 5.17%  | 9.70%  | 10.09% | 10.31% | 9.54%  | 7.98%  | 5.09%  | 9.69%  | 10.08% | 10.28% | 9.46%  | 7.82%  | 4.86%  | 9.68%  | 10.07% | 10.23% | 9.33%  | 7.57%  | 4.48%  |
| Brain                                                  | 0.78%  | 0.72%  | 0.55%  | 0.41%  | 0.28%  | 0.27%  | 0.78%  | 0.71%  | 0.55%  | 0.39%  | 0.24%  | 0.20%  | 0.78%  | 0.71%  | 0.53%  | 0.34%  | 0.12%  | -0.03% | 0.77%  | 0.70%  | 0.49%  | 0.25%  | -0.09% | -0.41% |
| Breast                                                 | 3.81%  | 4.10%  | 4.21%  | 4.21%  | 3.83%  | 2.77%  | 3.80%  | 4.09%  | 4.20%  | 4.19%  | 3.79%  | 2.69%  | 3.80%  | 4.09%  | 4.18%  | 4.13%  | 3.66%  | 2.46%  | 3.80%  | 4.08%  | 4.14%  | 4.03%  | 3.45%  | 2.08%  |
| Cervix                                                 | 2.31%  | 2.14%  | 1.95%  | 1.64%  | 1.11%  | 0.64%  | 2.31%  | 2.14%  | 1.94%  | 1.62%  | 1.07%  | 0.57%  | 2.31%  | 2.13%  | 1.92%  | 1.56%  | 0.94%  | 0.34%  | 2.30%  | 2.12%  | 1.88%  | 1.47%  | 0.74%  | -0.03% |
| Colorectal                                             | 1.36%  | 1.31%  | 1.32%  | 1.30%  | 1.13%  | 0.83%  | 1.35%  | 1.31%  | 1.31%  | 1.28%  | 1.09%  | 0.75%  | 1.35%  | 1.30%  | 1.29%  | 1.21%  | 0.95%  | 0.51%  | 1.35%  | 1.29%  | 1.25%  | 1.12%  | 0.73%  | 0.12%  |
| Kidney                                                 | 11.95% | 11.59% | 11.03% | 10.33% | 9.20%  | 5.76%  | 11.95% | 11.59% | 11.01% | 10.29% | 9.14%  | 5.67%  | 11.94% | 11.58% | 10.98% | 10.19% | 8.94%  | 5.41%  | 11.93% | 11.56% | 10.92% | 10.04% | 8.64%  | 4.99%  |
| Larynx                                                 | 1.26%  | 1.13%  | 1.15%  | 1.05%  | 0.93%  | 0.73%  | 1.26%  | 1.13%  | 1.15%  | 1.03%  | 0.89%  | 0.65%  | 1.26%  | 1.12%  | 1.12%  | 0.97%  | 0.75%  | 0.40%  | 1.25%  | 1.11%  | 1.09%  | 0.87%  | 0.54%  | 0.01%  |
| Liver                                                  | 0.50%  | 0.55%  | 0.47%  | 0.38%  | 0.25%  | 0.35%  | 0.50%  | 0.55%  | 0.46%  | 0.36%  | 0.21%  | 0.27%  | 0.50%  | 0.54%  | 0.44%  | 0.31%  | 0.09%  | 0.05%  | 0.50%  | 0.53%  | 0.41%  | 0.22%  | -0.12% | -0.32% |
| Lung                                                   | 3.37%  | 2.16%  | 1.69%  | 1.41%  | 0.90%  | 0.38%  | 3.37%  | 2.16%  | 1.68%  | 1.39%  | 0.85%  | 0.30%  | 3.37%  | 2.15%  | 1.66%  | 1.32%  | 0.73%  | 0.08%  | 3.36%  | 2.14%  | 1.62%  | 1.23%  | 0.51%  | -0.30% |
| Melanoma of skin                                       | 4.03%  | 3.97%  | 3.89%  | 3.78%  | 3.55%  | 2.89%  | 4.03%  | 3.97%  | 3.88%  | 3.76%  | 3.50%  | 2.81%  | 4.03%  | 3.96%  | 3.86%  | 3.70%  | 3.37%  | 2.57%  | 4.02%  | 3.95%  | 3.82%  | 3.60%  | 3.16%  | 2.18%  |
| Oesophagus                                             | 0.99%  | 0.91%  | 0.90%  | 0.80%  | 0.55%  | 0.10%  | 0.99%  | 0.90%  | 0.89%  | 0.78%  | 0.50%  | 0.02%  | 0.98%  | 0.90%  | 0.87%  | 0.72%  | 0.38%  | -0.20% | 0.98%  | 0.89%  | 0.83%  | 0.62%  | 0.17%  | -0.57% |
| Oral cavity                                            | 0.87%  | 0.70%  | 0.59%  | 0.53%  | 0.44%  | 0.31%  | 0.87%  | 0.70%  | 0.58%  | 0.51%  | 0.40%  | 0.24%  | 0.86%  | 0.70%  | 0.56%  | 0.45%  | 0.28%  | 0.01%  | 0.86%  | 0.69%  | 0.53%  | 0.36%  | 0.07%  | -0.36% |
| Oropharynx                                             | 0.37%  | 0.34%  | 0.29%  | 0.20%  | 0.12%  | 0.03%  | 0.37%  | 0.34%  | 0.28%  | 0.19%  | 0.08%  | -0.04% | 0.37%  | 0.33%  | 0.26%  | 0.13%  | -0.04% | -0.26% | 0.37%  | 0.32%  | 0.23%  | 0.04%  | -0.24% | -0.64% |
| Ovary                                                  | 2.16%  | 1.78%  | 1.44%  | 1.10%  | 0.81%  | 0.66%  | 2.16%  | 1.78%  | 1.43%  | 1.08%  | 0.77%  | 0.58%  | 2.15%  | 1.78%  | 1.41%  | 1.02%  | 0.64%  | 0.35%  | 2.15%  | 1.76%  | 1.38%  | 0.92%  | 0.43%  | -0.03% |
| Pancreas                                               | 0.32%  | 0.28%  | 0.29%  | 0.18%  | 0.11%  | 0.18%  | 0.32%  | 0.28%  | 0.28%  | 0.16%  | 0.07%  | 0.11%  | 0.32%  | 0.27%  | 0.26%  | 0.11%  | -0.05% | -0.11% | 0.31%  | 0.26%  | 0.23%  | 0.02%  | -0.25% | -0.49% |
| Prostate                                               | 12.25% | 12.23% | 12.32% | 12.31% | 12.08% | 10.09% | 12.24% | 12.23% | 12.31% | 12.28% | 12.02% | 10.02% | 12.24% | 12.22% | 12.26% | 12.18% | 11.87% | 9.79%  | 12.23% | 12.20% | 12.20% | 12.02% | 11.62% | 9.41%  |
| Stomach                                                | 1.19%  | 1.17%  | 1.01%  | 0.90%  | 0.75%  | 0.24%  | 1.19%  | 1.17%  | 1.00%  | 0.88%  | 0.71%  | 0.16%  | 1.19%  | 1.16%  | 0.98%  | 0.82%  | 0.57%  | -0.06% | 1.18%  | 1.15%  | 0.94%  | 0.72%  | 0.36%  | -0.43% |
| Testis                                                 | 6.45%  | 6.50%  | 6.38%  | 6.39%  | 6.19%  | 5.76%  | 6.45%  | 6.49%  | 6.37%  | 6.37%  | 6.15%  | 5.68%  | 6.45%  | 6.49%  | 6.35%  | 6.31%  | 6.01%  | 5.43%  | 6.44%  | 6.47%  | 6.31%  | 6.21%  | 5.79%  | 5.03%  |
| Thyroid                                                | 1.57%  | 1.54%  | 1.49%  | 1.52%  | 1.34%  | 1.40%  | 1.56%  | 1.53%  | 1.48%  | 1.50%  | 1.30%  | 1.32%  | 1.56%  | 1.53%  | 1.46%  | 1.44%  | 1.17%  | 1.08%  | 1.56%  | 1.52%  | 1.43%  | 1.34%  | 0.96%  | 0.68%  |
| Uterus                                                 | 2.73%  | 2.59%  | 2.54%  | 2.36%  | 2.08%  | 1.74%  | 2.73%  | 2.59%  | 2.53%  | 2.34%  | 2.03%  | 1.65%  | 2.73%  | 2.58%  | 2.51%  | 2.27%  | 1.90%  | 1.41%  | 2.72%  | 2.57%  | 2.47%  | 2.17%  | 1.68%  | 1.01%  |

**Supplementary Table 7: Survival benefit per referred patient of prompt investigatory referral versus 2-, 4-, and 6-month delay.**

Per patient referred (by age group and nosocomial infection rate).

Different age groups and differing levels of nosocomial infection rates (0.5%, 1%, 2.5%, 5%) considered.

Red indicates net survival advantage for investigatory referral compared to delay; Green indicates net survival disadvantage for investigatory referral compared to delay.

| Nosocomial COVID-19 Infection Rate (for investigatory referral) | 0.50% |       |       |        |        |        | 1%    |       |       |        |        |        | 2.50% |       |        |        |        |        | 5%     |        |        |        |        |        |
|-----------------------------------------------------------------|-------|-------|-------|--------|--------|--------|-------|-------|-------|--------|--------|--------|-------|-------|--------|--------|--------|--------|--------|--------|--------|--------|--------|--------|
|                                                                 | 30-39 | 40-49 | 50-59 | 60-69  | 70-79  | 80+    | 30-39 | 40-49 | 50-59 | 60-69  | 70-79  | 80+    | 30-39 | 40-49 | 50-59  | 60-69  | 70-79  | 80+    | 30-39  | 40-49  | 50-59  | 60-69  | 70-79  | 80+    |
| <b>2 month delay</b>                                            |       |       |       |        |        |        |       |       |       |        |        |        |       |       |        |        |        |        |        |        |        |        |        |        |
| Bladder                                                         | 1.47% | 1.38% | 1.31% | 1.12%  | 0.82%  | 0.09%  | 1.46% | 1.38% | 1.30% | 1.10%  | 0.78%  | 0.02%  | 1.46% | 1.37% | 1.28%  | 1.05%  | 0.65%  | -0.21% | 1.46%  | 1.36%  | 1.25%  | 0.95%  | 0.45%  | -0.58% |
| Brain                                                           | 0.07% | 0.09% | 0.11% | 0.10%  | 0.08%  | 0.04%  | 0.07% | 0.09% | 0.10% | 0.09%  | 0.04%  | -0.03% | 0.07% | 0.08% | 0.08%  | 0.03%  | -0.09% | -0.26% | 0.06%  | 0.07%  | 0.05%  | -0.06% | -0.29% | -0.63% |
| Breast                                                          | 0.14% | 0.09% | 0.07% | 0.05%  | 0.07%  | 0.06%  | 0.14% | 0.09% | 0.06% | 0.03%  | 0.03%  | -0.01% | 0.14% | 0.09% | 0.04%  | -0.03% | -0.09% | -0.23% | 0.14%  | 0.08%  | 0.01%  | -0.12% | -0.29% | -0.60% |
| Cervix                                                          | 0.09% | 0.14% | 0.19% | 0.17%  | 0.09%  | -0.02% | 0.09% | 0.14% | 0.18% | 0.15%  | 0.05%  | -0.09% | 0.08% | 0.13% | 0.16%  | 0.10%  | -0.07% | -0.31% | 0.08%  | 0.12%  | 0.13%  | 0.01%  | -0.27% | -0.68% |
| Colorectal                                                      | 0.10% | 0.11% | 0.10% | 0.08%  | 0.09%  | 0.06%  | 0.09% | 0.11% | 0.09% | 0.06%  | 0.05%  | -0.02% | 0.09% | 0.10% | 0.07%  | 0.01%  | -0.07% | -0.24% | 0.09%  | 0.09%  | 0.04%  | -0.08% | -0.28% | -0.62% |
| Kidney                                                          | 0.40% | 0.52% | 0.68% | 0.78%  | 0.81%  | 0.45%  | 0.40% | 0.52% | 0.68% | 0.76%  | 0.77%  | 0.38%  | 0.40% | 0.51% | 0.66%  | 0.71%  | 0.64%  | 0.15%  | 0.39%  | 0.50%  | 0.62%  | 0.61%  | 0.43%  | -0.22% |
| Larynx                                                          | 0.11% | 0.14% | 0.13% | 0.12%  | 0.11%  | 0.09%  | 0.11% | 0.14% | 0.12% | 0.10%  | 0.07%  | 0.01%  | 0.10% | 0.13% | 0.10%  | 0.05%  | -0.05% | -0.21% | 0.10%  | 0.12%  | 0.07%  | -0.04% | -0.25% | -0.59% |
| Liver                                                           | 0.19% | 0.20% | 0.18% | 0.12%  | 0.06%  | -0.02% | 0.19% | 0.19% | 0.18% | 0.10%  | 0.02%  | -0.10% | 0.19% | 0.19% | 0.16%  | 0.05%  | -0.11% | -0.32% | 0.18%  | 0.18%  | 0.12%  | -0.04% | -0.31% | -0.69% |
| Lung                                                            | 0.59% | 0.67% | 0.63% | 0.46%  | 0.27%  | -0.01% | 0.59% | 0.67% | 0.62% | 0.44%  | 0.22%  | -0.08% | 0.58% | 0.66% | 0.60%  | 0.38%  | 0.10%  | -0.30% | 0.58%  | 0.65%  | 0.56%  | 0.29%  | -0.10% | -0.68% |
| Melanoma of skin                                                | 0.08% | 0.10% | 0.12% | 0.13%  | 0.15%  | 0.26%  | 0.08% | 0.10% | 0.11% | 0.11%  | 0.11%  | 0.19%  | 0.08% | 0.09% | 0.10%  | 0.06%  | -0.01% | -0.03% | 0.07%  | 0.08%  | 0.06%  | -0.03% | -0.21% | -0.41% |
| Oesophagus                                                      | 0.37% | 0.36% | 0.35% | 0.29%  | 0.13%  | -0.06% | 0.37% | 0.36% | 0.35% | 0.27%  | 0.09%  | -0.14% | 0.37% | 0.35% | 0.33%  | 0.21%  | -0.04% | -0.36% | 0.36%  | 0.34%  | 0.29%  | 0.12%  | -0.24% | -0.73% |
| Oral cavity                                                     | 0.09% | 0.12% | 0.13% | 0.11%  | 0.08%  | 0.02%  | 0.09% | 0.12% | 0.13% | 0.09%  | 0.04%  | -0.05% | 0.09% | 0.12% | 0.11%  | 0.04%  | -0.08% | -0.28% | 0.08%  | 0.11%  | 0.07%  | -0.05% | -0.28% | -0.65% |
| Oropharynx                                                      | 0.03% | 0.04% | 0.05% | 0.03%  | 0.00%  | -0.05% | 0.03% | 0.04% | 0.04% | 0.01%  | -0.04% | -0.12% | 0.03% | 0.03% | 0.02%  | -0.04% | -0.16% | -0.34% | 0.03%  | 0.02%  | -0.01% | -0.13% | -0.36% | -0.71% |
| Ovary                                                           | 0.11% | 0.21% | 0.27% | 0.25%  | 0.18%  | 0.06%  | 0.11% | 0.21% | 0.26% | 0.23%  | 0.13%  | -0.01% | 0.11% | 0.21% | 0.24%  | 0.18%  | 0.01%  | -0.24% | 0.10%  | 0.20%  | 0.21%  | 0.09%  | -0.19% | -0.61% |
| Pancreas                                                        | 0.16% | 0.14% | 0.14% | 0.07%  | 0.01%  | -0.05% | 0.16% | 0.14% | 0.14% | 0.05%  | -0.03% | -0.13% | 0.15% | 0.14% | 0.12%  | -0.01% | -0.15% | -0.35% | 0.15%  | 0.13%  | 0.08%  | -0.10% | -0.35% | -0.72% |
| Prostate                                                        | 0.05% | 0.05% | 0.02% | -0.02% | -0.04% | -0.06% | 0.05% | 0.05% | 0.01% | -0.04% | -0.08% | -0.14% | 0.05% | 0.04% | -0.01% | -0.09% | -0.20% | -0.36% | 0.04%  | 0.03%  | -0.04% | -0.18% | -0.40% | -0.73% |
| Stomach                                                         | 0.33% | 0.33% | 0.32% | 0.26%  | 0.19%  | -0.02% | 0.33% | 0.32% | 0.31% | 0.24%  | 0.15%  | -0.09% | 0.32% | 0.32% | 0.29%  | 0.19%  | 0.03%  | -0.31% | 0.32%  | 0.31%  | 0.26%  | 0.10%  | -0.18% | -0.68% |
| Testis                                                          | 0.02% | 0.01% | 0.03% | 0.00%  | -0.01% | -0.01% | 0.02% | 0.01% | 0.02% | -0.02% | -0.05% | -0.09% | 0.02% | 0.00% | 0.00%  | -0.08% | -0.17% | -0.31% | 0.01%  | -0.01% | -0.03% | -0.17% | -0.37% | -0.68% |
| Thyroid                                                         | 0.00% | 0.00% | 0.01% | -0.02% | -0.01% | -0.07% | 0.00% | 0.00% | 0.00% | -0.03% | -0.05% | -0.15% | 0.00% | 0.00% | -0.02% | -0.09% | -0.17% | -0.37% | -0.01% | -0.01% | -0.05% | -0.18% | -0.37% | -0.74% |
| Uterus                                                          | 0.04% | 0.09% | 0.10% | 0.14%  | 0.17%  | 0.17%  | 0.04% | 0.09% | 0.09% | 0.12%  | 0.13%  | 0.09%  | 0.04% | 0.08% | 0.07%  | 0.06%  | 0.01%  | -0.13% | 0.03%  | 0.07%  | 0.04%  | -0.03% | -0.19% | -0.51% |
| <b>4 month delay</b>                                            |       |       |       |        |        |        |       |       |       |        |        |        |       |       |        |        |        |        |        |        |        |        |        |        |
| Bladder                                                         | 3.17% | 3.02% | 2.89% | 2.45%  | 1.75%  | 0.24%  | 3.16% | 3.01% | 2.88% | 2.43%  | 1.71%  | 0.16%  | 3.16% | 3.01% | 2.86%  | 2.36%  | 1.58%  | -0.06% | 3.16%  | 2.99%  | 2.82%  | 2.26%  | 1.37%  | -0.43% |
| Brain                                                           | 0.16% | 0.20% | 0.23% | 0.22%  | 0.17%  | 0.14%  | 0.16% | 0.19% | 0.23% | 0.20%  | 0.13%  | 0.07%  | 0.16% | 0.19% | 0.21%  | 0.15%  | 0.01%  | -0.16% | 0.16%  | 0.18%  | 0.17%  | 0.06%  | -0.19% | -0.53% |
| Breast                                                          | 0.31% | 0.21% | 0.15% | 0.12%  | 0.19%  | 0.21%  | 0.31% | 0.21% | 0.15% | 0.10%  | 0.15%  | 0.14%  | 0.31% | 0.20% | 0.13%  | 0.05%  | 0.03%  | -0.09% | 0.30%  | 0.19%  | 0.10%  | -0.04% | -0.17% | -0.46% |
| Cervix                                                          | 0.20% | 0.33% | 0.43% | 0.39%  | 0.21%  | 0.03%  | 0.20% | 0.32% | 0.42% | 0.37%  | 0.17%  | -0.05% | 0.20% | 0.32% | 0.40%  | 0.31%  | 0.05%  | -0.27% | 0.20%  | 0.31%  | 0.37%  | 0.22%  | -0.15% | -0.64% |
| Colorectal                                                      | 0.23% | 0.26% | 0.24% | 0.22%  | 0.26%  | 0.21%  | 0.23% | 0.25% | 0.23% | 0.20%  | 0.22%  | 0.14%  | 0.23% | 0.25% | 0.21%  | 0.15%  | 0.09%  | -0.09% | 0.22%  | 0.24%  | 0.18%  | 0.06%  | -0.11% | -0.47% |
| Kidney                                                          | 0.94% | 1.21% | 1.58% | 1.80%  | 1.84%  | 0.97%  | 0.94% | 1.21% | 1.57% | 1.78%  | 1.79%  | 0.89%  | 0.94% | 1.21% | 1.55%  | 1.72%  | 1.66%  | 0.66%  | 0.93%  | 1.20%  | 1.52%  | 1.61%  | 1.43%  | 0.28%  |
| Larynx                                                          | 0.25% | 0.31% | 0.29% | 0.28%  | 0.28%  | 0.26%  | 0.25% | 0.31% | 0.28% | 0.26%  | 0.24%  | 0.18%  | 0.24% | 0.30% | 0.26%  | 0.21%  | 0.12%  | -0.05% | 0.24%  | 0.29%  | 0.23%  | 0.12%  | -0.09% | -0.43% |
| Liver                                                           | 0.35% | 0.36% | 0.33% | 0.22%  | 0.12%  | 0.01%  | 0.35% | 0.36% | 0.32% | 0.20%  | 0.08%  | -0.06% | 0.34% | 0.35% | 0.30%  | 0.15%  | -0.05% | -0.28% | 0.34%  | 0.34%  | 0.27%  | 0.06%  | -0.25% | -0.65% |
| Lung                                                            | 1.25% | 1.28% | 1.14% | 0.81%  | 0.46%  | 0.02%  | 1.25% | 1.27% | 1.13% | 0.79%  | 0.42%  | -0.05% | 1.24% | 1.27% | 1.11%  | 0.74%  | 0.29%  | -0.27% | 1.24%  | 1.26%  | 1.07%  | 0.64%  | 0.09%  | -0.64% |
| Melanoma of skin                                                | 0.19% | 0.24% | 0.29% | 0.33%  | 0.41%  | 0.67%  | 0.19% | 0.24% | 0.29% | 0.31%  | 0.37%  | 0.60%  | 0.19% | 0.23% | 0.27%  | 0.26%  | 0.24%  | 0.37%  | 0.18%  | 0.22%  | 0.23%  | 0.17%  | 0.04%  | 0.00%  |
| Oesophagus                                                      | 0.67% | 0.64% | 0.63% | 0.52%  | 0.23%  | -0.06% | 0.67% | 0.64% | 0.62% | 0.50%  | 0.19%  | -0.13% | 0.67% | 0.63% | 0.60%  | 0.44%  | 0.07%  | -0.36% | 0.66%  | 0.62%  | 0.57%  | 0.34%  | -0.13% | -0.73% |

|                      |       |       |       |        |        |        |       |       |       |        |        |        |       |       |       |        |        |        |        |        |        |        |        |        |
|----------------------|-------|-------|-------|--------|--------|--------|-------|-------|-------|--------|--------|--------|-------|-------|-------|--------|--------|--------|--------|--------|--------|--------|--------|--------|
| Oral cavity          | 0.21% | 0.26% | 0.27% | 0.24%  | 0.20%  | 0.10%  | 0.20% | 0.26% | 0.27% | 0.22%  | 0.16%  | 0.03%  | 0.20% | 0.26% | 0.25% | 0.17%  | 0.04%  | -0.20% | 0.20%  | 0.25%  | 0.21%  | 0.08%  | -0.17% | -0.57% |
| Oropharynx           | 0.08% | 0.09% | 0.10% | 0.07%  | 0.04%  | -0.03% | 0.08% | 0.09% | 0.10% | 0.06%  | 0.00%  | -0.10% | 0.07% | 0.09% | 0.08% | 0.00%  | -0.12% | -0.32% | 0.07%  | 0.08%  | 0.04%  | -0.09% | -0.32% | -0.69% |
| Ovary                | 0.25% | 0.47% | 0.57% | 0.51%  | 0.36%  | 0.17%  | 0.25% | 0.47% | 0.57% | 0.49%  | 0.32%  | 0.09%  | 0.25% | 0.47% | 0.55% | 0.43%  | 0.20%  | -0.13% | 0.25%  | 0.46%  | 0.51%  | 0.34%  | -0.01% | -0.50% |
| Pancreas             | 0.26% | 0.23% | 0.24% | 0.11%  | 0.04%  | -0.04% | 0.26% | 0.23% | 0.23% | 0.09%  | 0.00%  | -0.12% | 0.25% | 0.22% | 0.21% | 0.04%  | -0.13% | -0.34% | 0.25%  | 0.21%  | 0.18%  | -0.05% | -0.33% | -0.71% |
| Prostate             | 0.12% | 0.12% | 0.05% | -0.02% | -0.04% | -0.05% | 0.12% | 0.11% | 0.04% | -0.04% | -0.08% | -0.13% | 0.11% | 0.11% | 0.02% | -0.09% | -0.20% | -0.35% | 0.11%  | 0.10%  | -0.01% | -0.18% | -0.40% | -0.72% |
| Stomach              | 0.64% | 0.64% | 0.61% | 0.50%  | 0.38%  | 0.01%  | 0.64% | 0.64% | 0.60% | 0.48%  | 0.34%  | -0.06% | 0.64% | 0.63% | 0.58% | 0.42%  | 0.21%  | -0.28% | 0.63%  | 0.62%  | 0.54%  | 0.33%  | 0.00%  | -0.66% |
| Testis               | 0.05% | 0.03% | 0.06% | 0.01%  | 0.02%  | 0.06%  | 0.05% | 0.03% | 0.06% | 0.00%  | -0.02% | -0.02% | 0.05% | 0.02% | 0.04% | -0.06% | -0.14% | -0.24% | 0.04%  | 0.01%  | 0.00%  | -0.15% | -0.34% | -0.61% |
| Thyroid              | 0.00% | 0.01% | 0.02% | -0.01% | 0.02%  | -0.07% | 0.00% | 0.01% | 0.02% | -0.03% | -0.02% | -0.15% | 0.00% | 0.00% | 0.00% | -0.09% | -0.14% | -0.37% | -0.01% | -0.01% | -0.04% | -0.18% | -0.34% | -0.74% |
| Uterus               | 0.10% | 0.21% | 0.24% | 0.33%  | 0.43%  | 0.45%  | 0.10% | 0.21% | 0.23% | 0.32%  | 0.39%  | 0.37%  | 0.10% | 0.21% | 0.21% | 0.26%  | 0.27%  | 0.14%  | 0.09%  | 0.20%  | 0.18%  | 0.17%  | 0.07%  | -0.23% |
| <b>6 month delay</b> |       |       |       |        |        |        |       |       |       |        |        |        |       |       |       |        |        |        |        |        |        |        |        |        |
| Bladder              | 4.98% | 4.81% | 4.65% | 3.86%  | 2.64%  | 0.35%  | 4.98% | 4.81% | 4.64% | 3.84%  | 2.60%  | 0.27%  | 4.97% | 4.80% | 4.62% | 3.77%  | 2.47%  | 0.05%  | 4.97%  | 4.78%  | 4.58%  | 3.67%  | 2.25%  | -0.32% |
| Brain                | 0.27% | 0.32% | 0.35% | 0.31%  | 0.24%  | 0.21%  | 0.27% | 0.31% | 0.35% | 0.30%  | 0.19%  | 0.14%  | 0.27% | 0.31% | 0.33% | 0.24%  | 0.07%  | -0.09% | 0.27%  | 0.30%  | 0.29%  | 0.15%  | -0.13% | -0.47% |
| Breast               | 0.50% | 0.34% | 0.26% | 0.21%  | 0.34%  | 0.37%  | 0.50% | 0.34% | 0.25% | 0.19%  | 0.30%  | 0.30%  | 0.50% | 0.33% | 0.23% | 0.14%  | 0.18%  | 0.07%  | 0.49%  | 0.32%  | 0.20%  | 0.04%  | -0.02% | -0.30% |
| Cervix               | 0.36% | 0.56% | 0.72% | 0.61%  | 0.32%  | 0.06%  | 0.36% | 0.56% | 0.71% | 0.60%  | 0.28%  | -0.02% | 0.36% | 0.55% | 0.69% | 0.54%  | 0.16%  | -0.24% | 0.35%  | 0.54%  | 0.66%  | 0.45%  | -0.04% | -0.61% |
| Colorectal           | 0.40% | 0.44% | 0.41% | 0.39%  | 0.45%  | 0.36%  | 0.40% | 0.43% | 0.41% | 0.37%  | 0.41%  | 0.28%  | 0.39% | 0.43% | 0.39% | 0.32%  | 0.28%  | 0.05%  | 0.39%  | 0.42%  | 0.35%  | 0.23%  | 0.07%  | -0.33% |
| Kidney               | 1.66% | 2.12% | 2.71% | 3.03%  | 3.01%  | 1.41%  | 1.66% | 2.12% | 2.71% | 3.01%  | 2.96%  | 1.33%  | 1.65% | 2.11% | 2.68% | 2.94%  | 2.81%  | 1.10%  | 1.65%  | 2.10%  | 2.64%  | 2.83%  | 2.58%  | 0.72%  |
| Larynx               | 0.41% | 0.50% | 0.48% | 0.46%  | 0.46%  | 0.42%  | 0.41% | 0.50% | 0.47% | 0.44%  | 0.42%  | 0.34%  | 0.41% | 0.50% | 0.45% | 0.38%  | 0.29%  | 0.11%  | 0.40%  | 0.49%  | 0.42%  | 0.29%  | 0.08%  | -0.28% |
| Liver                | 0.44% | 0.47% | 0.42% | 0.28%  | 0.14%  | 0.04%  | 0.44% | 0.47% | 0.41% | 0.26%  | 0.10%  | -0.04% | 0.44% | 0.46% | 0.39% | 0.20%  | -0.02% | -0.26% | 0.43%  | 0.45%  | 0.36%  | 0.11%  | -0.22% | -0.63% |
| Lung                 | 1.92% | 1.74% | 1.47% | 1.02%  | 0.55%  | 0.03%  | 1.92% | 1.74% | 1.46% | 1.00%  | 0.50%  | -0.04% | 1.92% | 1.73% | 1.44% | 0.94%  | 0.38%  | -0.26% | 1.91%  | 1.72%  | 1.40%  | 0.84%  | 0.17%  | -0.63% |
| Melanoma of skin     | 0.34% | 0.43% | 0.52% | 0.59%  | 0.73%  | 1.15%  | 0.34% | 0.43% | 0.52% | 0.57%  | 0.69%  | 1.07%  | 0.34% | 0.42% | 0.50% | 0.52%  | 0.57%  | 0.84%  | 0.34%  | 0.41%  | 0.46%  | 0.43%  | 0.37%  | 0.46%  |
| Oesophagus           | 0.86% | 0.81% | 0.80% | 0.65%  | 0.29%  | -0.06% | 0.86% | 0.81% | 0.79% | 0.63%  | 0.24%  | -0.13% | 0.86% | 0.80% | 0.77% | 0.57%  | 0.12%  | -0.35% | 0.85%  | 0.79%  | 0.74%  | 0.47%  | -0.08% | -0.72% |
| Oral cavity          | 0.34% | 0.41% | 0.40% | 0.35%  | 0.29%  | 0.16%  | 0.34% | 0.40% | 0.40% | 0.33%  | 0.25%  | 0.08%  | 0.33% | 0.40% | 0.38% | 0.28%  | 0.13%  | -0.14% | 0.33%  | 0.39%  | 0.34%  | 0.19%  | -0.08% | -0.51% |
| Oropharynx           | 0.13% | 0.15% | 0.16% | 0.11%  | 0.07%  | -0.02% | 0.13% | 0.15% | 0.16% | 0.10%  | 0.02%  | -0.09% | 0.13% | 0.15% | 0.14% | 0.04%  | -0.10% | -0.31% | 0.12%  | 0.14%  | 0.10%  | -0.05% | -0.30% | -0.68% |
| Ovary                | 0.44% | 0.77% | 0.87% | 0.73%  | 0.49%  | 0.24%  | 0.44% | 0.77% | 0.86% | 0.71%  | 0.45%  | 0.16%  | 0.44% | 0.76% | 0.84% | 0.65%  | 0.32%  | -0.06% | 0.43%  | 0.75%  | 0.81%  | 0.55%  | 0.12%  | -0.44% |
| Pancreas             | 0.31% | 0.27% | 0.28% | 0.13%  | 0.04%  | -0.04% | 0.30% | 0.27% | 0.27% | 0.11%  | 0.00%  | -0.11% | 0.30% | 0.26% | 0.25% | 0.05%  | -0.12% | -0.34% | 0.30%  | 0.25%  | 0.22%  | -0.04% | -0.32% | -0.71% |
| Prostate             | 0.19% | 0.19% | 0.09% | -0.02% | -0.04% | -0.04% | 0.19% | 0.19% | 0.08% | -0.04% | -0.08% | -0.11% | 0.19% | 0.18% | 0.06% | -0.09% | -0.20% | -0.34% | 0.18%  | 0.17%  | 0.03%  | -0.18% | -0.40% | -0.71% |
| Stomach              | 0.90% | 0.89% | 0.82% | 0.67%  | 0.50%  | 0.02%  | 0.90% | 0.89% | 0.81% | 0.65%  | 0.46%  | -0.05% | 0.90% | 0.88% | 0.79% | 0.59%  | 0.33%  | -0.27% | 0.89%  | 0.87%  | 0.76%  | 0.49%  | 0.12%  | -0.65% |
| Testis               | 0.09% | 0.05% | 0.11% | 0.04%  | 0.05%  | 0.14%  | 0.09% | 0.05% | 0.10% | 0.02%  | 0.01%  | 0.06%  | 0.08% | 0.04% | 0.08% | -0.04% | -0.11% | -0.16% | 0.08%  | 0.03%  | 0.05%  | -0.13% | -0.31% | -0.53% |
| Thyroid              | 0.00% | 0.02% | 0.04% | -0.01% | 0.05%  | -0.07% | 0.00% | 0.02% | 0.04% | -0.03% | 0.01%  | -0.15% | 0.00% | 0.01% | 0.02% | -0.08% | -0.11% | -0.37% | -0.01% | 0.00%  | -0.02% | -0.17% | -0.31% | -0.74% |
| Uterus               | 0.18% | 0.38% | 0.43% | 0.58%  | 0.74%  | 0.75%  | 0.18% | 0.38% | 0.42% | 0.57%  | 0.70%  | 0.68%  | 0.18% | 0.37% | 0.40% | 0.51%  | 0.58%  | 0.44%  | 0.17%  | 0.36%  | 0.37%  | 0.42%  | 0.37%  | 0.06%  |

**Supplementary Table 8: Life-years lost per patient referred from 2-, 4-, and 6-month delay (by age group).**

Nosocomial infection rate: 0.5% per investigatory referral.

Red indicates values above median and blue values below the median

|                         | 2 month delay |       |       |       |       |      | 4 month delay |       |       |       |       |      | 6 month delay |       |       |       |       |      |
|-------------------------|---------------|-------|-------|-------|-------|------|---------------|-------|-------|-------|-------|------|---------------|-------|-------|-------|-------|------|
|                         | 30-39         | 40-49 | 50-59 | 60-69 | 70-79 | 80+  | 30-39         | 40-49 | 50-59 | 60-69 | 70-79 | 80+  | 30-39         | 40-49 | 50-59 | 60-69 | 70-79 | 80+  |
| <b>Bladder</b>          | 0.69          | 0.52  | 0.37  | 0.22  | 0.10  | 0.01 | 1.49          | 1.13  | 0.82  | 0.48  | 0.21  | 0.02 | 2.34          | 1.80  | 1.32  | 0.77  | 0.32  | 0.02 |
| <b>Brain</b>            | 0.03          | 0.03  | 0.03  | 0.02  | 0.01  | 0.00 | 0.08          | 0.07  | 0.07  | 0.04  | 0.02  | 0.01 | 0.13          | 0.12  | 0.10  | 0.06  | 0.03  | 0.01 |
| <b>Breast</b>           | 0.07          | 0.04  | 0.02  | 0.01  | 0.01  | 0.00 | 0.15          | 0.08  | 0.04  | 0.02  | 0.02  | 0.01 | 0.24          | 0.13  | 0.07  | 0.04  | 0.04  | 0.02 |
| <b>Cervix</b>           | 0.04          | 0.05  | 0.05  | 0.03  | 0.01  | 0.00 | 0.10          | 0.12  | 0.12  | 0.08  | 0.03  | 0.00 | 0.17          | 0.21  | 0.20  | 0.12  | 0.04  | 0.00 |
| <b>Colorectal</b>       | 0.04          | 0.04  | 0.03  | 0.02  | 0.01  | 0.00 | 0.11          | 0.10  | 0.07  | 0.04  | 0.03  | 0.01 | 0.19          | 0.16  | 0.12  | 0.08  | 0.06  | 0.02 |
| <b>Kidney</b>           | 0.19          | 0.19  | 0.19  | 0.16  | 0.10  | 0.03 | 0.44          | 0.46  | 0.45  | 0.36  | 0.22  | 0.06 | 0.78          | 0.79  | 0.77  | 0.60  | 0.37  | 0.09 |
| <b>Larynx</b>           | 0.05          | 0.05  | 0.04  | 0.02  | 0.01  | 0.01 | 0.12          | 0.12  | 0.08  | 0.06  | 0.03  | 0.02 | 0.19          | 0.19  | 0.14  | 0.09  | 0.06  | 0.03 |
| <b>Liver</b>            | 0.09          | 0.07  | 0.05  | 0.02  | 0.01  | 0.00 | 0.16          | 0.14  | 0.09  | 0.04  | 0.01  | 0.00 | 0.21          | 0.18  | 0.12  | 0.06  | 0.02  | 0.00 |
| <b>Lung</b>             | 0.28          | 0.25  | 0.18  | 0.09  | 0.03  | 0.00 | 0.59          | 0.48  | 0.32  | 0.16  | 0.06  | 0.00 | 0.90          | 0.65  | 0.42  | 0.20  | 0.07  | 0.00 |
| <b>Melanoma of skin</b> | 0.04          | 0.04  | 0.03  | 0.03  | 0.02  | 0.02 | 0.09          | 0.09  | 0.08  | 0.07  | 0.05  | 0.04 | 0.16          | 0.16  | 0.15  | 0.12  | 0.09  | 0.07 |
| <b>Oesophagus</b>       | 0.17          | 0.13  | 0.10  | 0.06  | 0.02  | 0.00 | 0.31          | 0.24  | 0.18  | 0.10  | 0.03  | 0.00 | 0.41          | 0.30  | 0.23  | 0.13  | 0.03  | 0.00 |
| <b>Oral cavity</b>      | 0.04          | 0.05  | 0.04  | 0.02  | 0.01  | 0.00 | 0.10          | 0.10  | 0.08  | 0.05  | 0.02  | 0.01 | 0.16          | 0.15  | 0.11  | 0.07  | 0.04  | 0.01 |
| <b>Oropharynx</b>       | 0.02          | 0.02  | 0.01  | 0.01  | 0.00  | 0.00 | 0.04          | 0.04  | 0.03  | 0.01  | 0.00  | 0.00 | 0.06          | 0.06  | 0.05  | 0.02  | 0.01  | 0.00 |
| <b>Ovary</b>            | 0.05          | 0.08  | 0.08  | 0.05  | 0.02  | 0.00 | 0.12          | 0.18  | 0.16  | 0.10  | 0.04  | 0.01 | 0.21          | 0.29  | 0.25  | 0.14  | 0.06  | 0.02 |
| <b>Pancreas</b>         | 0.07          | 0.05  | 0.04  | 0.01  | 0.00  | 0.00 | 0.12          | 0.09  | 0.07  | 0.02  | 0.00  | 0.00 | 0.14          | 0.10  | 0.08  | 0.03  | 0.01  | 0.00 |
| <b>Prostate</b>         | 0.02          | 0.02  | 0.01  | 0.00  | 0.00  | 0.00 | 0.06          | 0.04  | 0.01  | 0.00  | 0.00  | 0.00 | 0.09          | 0.07  | 0.02  | 0.00  | 0.00  | 0.00 |
| <b>Stomach</b>          | 0.15          | 0.12  | 0.09  | 0.05  | 0.02  | 0.00 | 0.30          | 0.24  | 0.17  | 0.10  | 0.05  | 0.00 | 0.42          | 0.33  | 0.23  | 0.13  | 0.06  | 0.00 |
| <b>Testis</b>           | 0.01          | 0.00  | 0.01  | 0.00  | 0.00  | 0.00 | 0.02          | 0.01  | 0.02  | 0.00  | 0.00  | 0.00 | 0.04          | 0.02  | 0.03  | 0.01  | 0.01  | 0.01 |
| <b>Thyroid</b>          | 0.00          | 0.00  | 0.00  | 0.00  | 0.00  | 0.00 | 0.00          | 0.00  | 0.01  | 0.00  | 0.00  | 0.00 | 0.00          | 0.01  | 0.01  | 0.00  | 0.01  | 0.00 |
| <b>Uterus</b>           | 0.02          | 0.03  | 0.03  | 0.03  | 0.02  | 0.01 | 0.05          | 0.08  | 0.07  | 0.07  | 0.05  | 0.03 | 0.08          | 0.14  | 0.12  | 0.12  | 0.09  | 0.05 |

**Supplementary Table 9: Multivariate sensitivity analysis.**

Lives lost and life-years lost per year from 2 month delay, by variation in Fatality HRs, COVID-19 annual population infection rate, COVID-19 per day nosocomial infection rate, and "cancer multiplier" for COVID-19 case fatality rate.

Highlighted in dark grey are the lives lost and life years lost per year from 2 month delay at default parameter estimates.

| Progressiveness/Per Day Transition Rate | Baseline Fatality HR |                        | Fatality HR -2CI  |                        | Fatality HR +2CI  |                        | Increased Fatality HR for High Progressiveness |                        |
|-----------------------------------------|----------------------|------------------------|-------------------|------------------------|-------------------|------------------------|------------------------------------------------|------------------------|
|                                         | LOW                  | 0.0030                 | LOW               | 0.0025                 | LOW               | 0.0035                 | LOW                                            | 0.0030                 |
|                                         | MOD                  | 0.0056                 | MOD               | 0.0047                 | MOD               | 0.0065                 | MOD                                            | 0.0056                 |
|                                         | HIGH                 | 0.0056                 | HIGH              | 0.0047                 | HIGH              | 0.0065                 | HIGH                                           | 0.0105                 |
| IMPACT OF 2 MONTH DELAY                 | Lives Lost (year)    | Life-Years lost (year) | Lives Lost (year) | Life-Years lost (year) | Lives Lost (year) | Life-Years lost (year) | Lives Lost (year)                              | Life-Years lost (year) |
| <b>Cancer Multiplier: 2-fold</b>        |                      |                        |                   |                        |                   |                        |                                                |                        |
| <b>Population infection rate: 0.05</b>  |                      |                        |                   |                        |                   |                        |                                                |                        |
| Nosocomial rate: 10%                    | 2,909                | 53,203                 | 2,426             | 44,313                 | 3,398             | 62,227                 | 3,788                                          | 72,170                 |
| Nosocomial rate: 5%                     | 2,932                | 53,492                 | 2,445             | 44,554                 | 3,425             | 62,562                 | 3,818                                          | 72,568                 |
| Nosocomial rate: 2%                     | 2,949                | 53,707                 | 2,460             | 44,734                 | 3,445             | 62,812                 | 3,840                                          | 72,877                 |
| Nosocomial rate: 1%                     | 2,956                | 53,787                 | 2,465             | 44,801                 | 3,452             | 62,905                 | 3,849                                          | 72,994                 |
| <b>Population infection rate: 0.2</b>   |                      |                        |                   |                        |                   |                        |                                                |                        |
| Nosocomial rate: 10%                    | 2,853                | 52,565                 | 2,379             | 43,780                 | 3,332             | 61,482                 | 3,721                                          | 71,361                 |
| Nosocomial rate: 5%                     | 2,875                | 52,847                 | 2,398             | 44,016                 | 3,359             | 61,810                 | 3,750                                          | 71,751                 |
| Nosocomial rate: 2%                     | 2,892                | 53,057                 | 2,412             | 44,192                 | 3,378             | 62,055                 | 3,772                                          | 72,053                 |
| Nosocomial rate: 1%                     | 2,898                | 53,136                 | 2,417             | 44,257                 | 3,385             | 62,146                 | 3,780                                          | 72,168                 |
| <b>Population infection rate: 0.5</b>   |                      |                        |                   |                        |                   |                        |                                                |                        |
| Nosocomial rate: 10%                    | 2,740                | 51,288                 | 2,285             | 42,714                 | 3,201             | 59,992                 | 3,587                                          | 69,741                 |
| Nosocomial rate: 5%                     | 2,762                | 51,558                 | 2,303             | 42,939                 | 3,226             | 60,305                 | 3,614                                          | 70,115                 |
| Nosocomial rate: 2%                     | 2,777                | 51,759                 | 2,316             | 43,108                 | 3,244             | 60,540                 | 3,635                                          | 70,406                 |
| Nosocomial rate: 1%                     | 2,783                | 51,834                 | 2,321             | 43,171                 | 3,251             | 60,627                 | 3,643                                          | 70,517                 |
| <b>Cancer Multiplier: 5-fold</b>        |                      |                        |                   |                        |                   |                        |                                                |                        |
| <b>Population infection rate: 0.05</b>  |                      |                        |                   |                        |                   |                        |                                                |                        |
| Nosocomial rate: 10%                    | 2,881                | 52,884                 | 2,402             | 44,046                 | 3,365             | 61,854                 | 3,754                                          | 71,765                 |
| Nosocomial rate: 5%                     | 2,904                | 53,169                 | 2,422             | 44,285                 | 3,392             | 62,186                 | 3,784                                          | 72,159                 |
| Nosocomial rate: 2%                     | 2,921                | 53,382                 | 2,436             | 44,463                 | 3,412             | 62,434                 | 3,806                                          | 72,465                 |
| Nosocomial rate: 1%                     | 2,927                | 53,461                 | 2,441             | 44,529                 | 3,419             | 62,526                 | 3,814                                          | 72,581                 |
| <b>Population infection rate: 0.2</b>   |                      |                        |                   |                        |                   |                        |                                                |                        |
| Nosocomial rate: 10%                    | 2,740                | 51,288                 | 2,285             | 42,714                 | 3,201             | 59,992                 | 3,587                                          | 69,741                 |
| Nosocomial rate: 5%                     | 2,762                | 51,558                 | 2,303             | 42,939                 | 3,226             | 60,305                 | 3,614                                          | 70,115                 |
| Nosocomial rate: 2%                     | 2,777                | 51,759                 | 2,316             | 43,108                 | 3,244             | 60,540                 | 3,635                                          | 70,406                 |
| Nosocomial rate: 1%                     | 2,783                | 51,834                 | 2,321             | 43,171                 | 3,251             | 60,627                 | 3,643                                          | 70,517                 |
| <b>Population infection rate: 0.5</b>   |                      |                        |                   |                        |                   |                        |                                                |                        |
| Nosocomial rate: 10%                    | 2,459                | 48,096                 | 2,050             | 40,049                 | 2,873             | 56,266                 | 3,252                                          | 65,692                 |
| Nosocomial rate: 5%                     | 2,477                | 48,334                 | 2,066             | 40,249                 | 2,894             | 56,544                 | 3,276                                          | 66,028                 |
| Nosocomial rate: 2%                     | 2,491                | 48,513                 | 2,077             | 40,398                 | 2,910             | 56,751                 | 3,294                                          | 66,289                 |
| Nosocomial rate: 1%                     | 2,496                | 48,579                 | 2,081             | 40,454                 | 2,915             | 56,829                 | 3,301                                          | 66,389                 |

**Supplementary Table 10: Surgical intervention (major resections only) and duration of admission (days), by stage.**

| Cancer                               | Stage        | Major resection                                                 | ICU (days) | Ward (days) |
|--------------------------------------|--------------|-----------------------------------------------------------------|------------|-------------|
| Bladder                              | 1            | Cystectomy                                                      | 2          | 7           |
| Bladder                              | 2            | Cystectomy                                                      | 2          | 7           |
| Bladder                              | 3            | Cystectomy                                                      | 2          | 7           |
| Breast (all hormone marker statuses) | 1            | Wide Local Excision                                             | 0          | 1           |
| Breast (all hormone marker statuses) | 2            | Wide Local Excision                                             | 0          | 1           |
| Breast (all hormone marker statuses) | 3            | Wide Local Excision                                             | 0          | 1           |
| Brain (all)                          | 1-3 combined | Neuro Resection                                                 | 1          | 3           |
| Brain (malignant)                    | 1-3 combined | Neuro Resection                                                 | 1          | 3           |
| Brain (non-malignant)                | 1-3 combined | Neuro Resection                                                 | 1          | 3           |
| Cervix                               | 1            | Open Hysterectomy+/- Bilateral Salpingo-oophrectomy             | 0          | 3           |
| Cervix                               | 2            | Open Hysterectomy+/- Bilateral Salpingo-oophrectomy             | 0          | 3           |
| Cervix                               | 3            | Open Hysterectomy+/- Bilateral Salpingo-oophrectomy             | 0          | 3           |
| Colorectal                           | 1            | Open Resection/AP resection                                     | 1          | 5           |
| Colorectal                           | 2            | Open Resection/AP resection                                     | 1          | 5           |
| Colorectal                           | 3            | Open Resection/AP resection                                     | 1          | 5           |
| Kidney                               | 1            | Partial Nephrectomy                                             | 0          | 5           |
| Kidney                               | 2            | Open Nephrectomy                                                | 1          | 5           |
| Kidney                               | 3            | Open Nephrectomy                                                | 1          | 5           |
| Larynx                               | 1            | Laryngectomy                                                    | 1          | 6           |
| Larynx                               | 2            | Laryngectomy                                                    | 1          | 6           |
| Larynx                               | 3            | Laryngectomy + neck dissection                                  | 1          | 6           |
| Liver                                | 1            | Liver resection                                                 | 1          | 7           |
| Liver                                | 2            | Liver resection                                                 | 1          | 7           |
| Liver                                | 3            | Liver resection                                                 | 1          | 7           |
| Lung                                 | 1            | Lobectomy                                                       | 1          | 7           |
| Lung                                 | 2            | Lobectomy                                                       | 1          | 7           |
| Lung                                 | 3            | Lobectomy                                                       | 1          | 7           |
| Melanoma of skin                     | 1            | Simple skin resection                                           | 0          | 1           |
| Melanoma of skin                     | 2            | Complex skin resection                                          | 0          | 2           |
| Melanoma of skin                     | 3            | Complex skin resection                                          | 0          | 2           |
| Oesophagus                           | 1            | Oesophagectomy                                                  | 2          | 10          |
| Oesophagus                           | 2            | Oesophagectomy                                                  | 2          | 10          |
| Oesophagus                           | 3            | Oesophagectomy                                                  | 2          | 10          |
| Oral cavity                          | 1            | Wide local excision                                             | 0          | 3           |
| Oral cavity                          | 2            | Wide local excision                                             | 0          | 3           |
| Oral cavity                          | 3            | Wide local excision                                             | 0          | 3           |
| Oropharynx                           | 1            | Resection                                                       | 0          | 3           |
| Oropharynx                           | 2            | Resection                                                       | 0          | 3           |
| Oropharynx                           | 3            | Resection                                                       | 0          | 3           |
| Ovary                                | 1            | Uni-/Bilateral Salpingo-oophrectomy                             | 0          | 2           |
| Ovary                                | 2            | Uni-/Bilateral Salpingo-oophrectomy                             | 0          | 2           |
| Ovary                                | 3            | Bilateral Salpingo-oophrectomy/Omentectomy/Peritoneal clearance | 1          | 7           |
| Pancreas                             | 1            | Pancreatectomy/ Whipples Procedure                              | 2          | 10          |
| Pancreas                             | 2            | Pancreatectomy/ Whipples Procedure                              | 2          | 10          |
| Pancreas                             | 3            | Pancreatectomy/ Whipples Procedure                              | 2          | 10          |

|          |              |                                     |   |   |
|----------|--------------|-------------------------------------|---|---|
| Prostate | 1            | Radical Prostatectomy               | 1 | 5 |
| Prostate | 2            | Radical Prostatectomy               | 1 | 5 |
| Prostate | 3            | Radical Prostatectomy               | 1 | 5 |
| Stomach  | 1            | Partial Gastrectomy                 | 2 | 7 |
| Stomach  | 2            | Gastrectomy                         | 2 | 9 |
| Stomach  | 3            | Gastrectomy                         | 2 | 9 |
| Testis   | 1            | Orchidectomy                        | 0 | 1 |
| Testis   | 2            | Orchidectomy                        | 0 | 1 |
| Testis   | 3            | Orchidectomy + RPLN dissection      | 0 | 3 |
| Thymus   | 1-3 combined | Thymectomy                          | 0 | 4 |
| Thyroid  | 1            | Thyroidectomy/lobectomy             | 0 | 3 |
| Thyroid  | 2            | Thyroidectomy/lobectomy + clearance | 0 | 3 |
| Thyroid  | 3            | Thyroidectomy/lobectomy + clearance | 0 | 3 |
| Uterus   | 1            | Open Hysterectomy+/- BSO            | 0 | 3 |
| Uterus   | 2            | Open Hysterectomy+/- BSO            | 0 | 3 |
| Uterus   | 3            | Open Hysterectomy+/- BSO            | 0 | 3 |

**Supplementary Table 11: 'Technical' risk of death per investigatory referral, by tumour type.**

| Cancer Type | Procedure-related technical risk |
|-------------|----------------------------------|
| Colorectal  | 0.010%                           |
| Lung        | 0.005%                           |
| Bladder     | 0.005%                           |



**Supplementary Table 12: Criteria for Urgent (2WW) investigatory referral from Primary Care**

| Tumour Group  | Criteria for urgent referral/urgent investigation in primary care                                                                                                                                                                                                                                                                                                                                                                                                                                                                                                                                                                                                                                                                                                            | Criteria for non urgent referral                                                                                                                                                                                                                                                                                                                                                                                                                                          |
|---------------|------------------------------------------------------------------------------------------------------------------------------------------------------------------------------------------------------------------------------------------------------------------------------------------------------------------------------------------------------------------------------------------------------------------------------------------------------------------------------------------------------------------------------------------------------------------------------------------------------------------------------------------------------------------------------------------------------------------------------------------------------------------------------|---------------------------------------------------------------------------------------------------------------------------------------------------------------------------------------------------------------------------------------------------------------------------------------------------------------------------------------------------------------------------------------------------------------------------------------------------------------------------|
| Brain and CNS | Adults with: <ul style="list-style-type: none"> <li>• Progressive, sub-acute loss of central neurological function</li> <li>• New onset seizures – focal or interictal focal deficit</li> <li>• Rapid personality change or behavioural disturbance / slowness confirmed by witnesses with no reasonable explanation</li> <li>• Headache with sinister features suggestive of raised intracranial pressure including nausea, vomiting, drowsiness, pulse-synchronous tinnitus, worse on supine position, awakens sleep, behavioural slowness, cognitive decline</li> <li>• Isolated new onset daily headache duration</li> </ul>                                                                                                                                             |                                                                                                                                                                                                                                                                                                                                                                                                                                                                           |
| Breast        | Women of any age (particularly age $\geq 30$ ) with the following symptoms <ul style="list-style-type: none"> <li>• Suspicious breast lump</li> <li>• Persistent or unexplained lump in axilla</li> <li>• Unilateral nipple discharge (blood-stained/serous), retraction, ulceration, distortion, eczema resistant to topical steroids, other changes of concern</li> <li>• Skin changes that suggest breast cancer including nodules, ulceration, peau d'orange or dimpling</li> <li>• Unilateral non-cyclical breast pain persisting beyond one menstrual cycle (higher suspicion if aged <math>\geq 30</math>)</li> <li>• Previous history of breast cancer plus suspicious symptoms</li> <li>• Men aged <math>\geq 50</math> and over with a sub-areolar lump</li> </ul> | The following patients do not usually need urgent referral to a breast clinic - consider a non-urgent referral for the following: <ul style="list-style-type: none"> <li>• Bilateral nipple discharge</li> <li>• Sebaceous cysts</li> <li>• Bilateral gynaecomastia</li> <li>• Bilateral breast pain</li> <li>• Asymptomatic patients with a family history of breast cancer. (Please note there may be a special 'family history breast clinic' in your area)</li> </ul> |
| Gynae         | <p><b>Ovarian Cancer</b></p> Carry out tests in primary care (see below) if a woman (especially if aged 45 or over) reports having any of the following symptoms on a persistent or frequent basis – particularly more than 12 times per month: <ul style="list-style-type: none"> <li>• Persistent abdominal distension or 'bloating'</li> <li>• Feeling full (early satiety) and/or loss of appetite</li> <li>• Pelvic or abdominal pain</li> <li>• Increased urinary urgency and/or frequency. (CG122, 2011)</li> </ul>                                                                                                                                                                                                                                                   |                                                                                                                                                                                                                                                                                                                                                                                                                                                                           |
|               | <p><b>Endometrial Cancer</b></p> Women aged 45 and over with unexplained symptoms of vaginal discharge* who: <ul style="list-style-type: none"> <li>• Are presenting with these symptoms for the first time</li> <li>• Have thrombocytosis</li> <li>• Report haematuria</li> <li>or</li> <li>• Have visible haematuria and                             <ul style="list-style-type: none"> <li>○ Low haemoglobin level</li> <li>○ Thrombocytosis</li> <li>○ High blood glucose levels</li> </ul> </li> </ul>                                                                                                                                                                                                                                                                  |                                                                                                                                                                                                                                                                                                                                                                                                                                                                           |
|               | <p><b>Cervix</b></p> <ul style="list-style-type: none"> <li>• Appearance of cervix consistent with cervical cancer</li> </ul>                                                                                                                                                                                                                                                                                                                                                                                                                                                                                                                                                                                                                                                |                                                                                                                                                                                                                                                                                                                                                                                                                                                                           |
|               | <p><b>Vagina</b></p> <ul style="list-style-type: none"> <li>• Unexplained palpable mass in or at entrance to vagina</li> </ul>                                                                                                                                                                                                                                                                                                                                                                                                                                                                                                                                                                                                                                               |                                                                                                                                                                                                                                                                                                                                                                                                                                                                           |
|               | <p><b>Vulva</b></p> <ul style="list-style-type: none"> <li>• Unexplained vulval lump, ulceration or bleeding</li> </ul>                                                                                                                                                                                                                                                                                                                                                                                                                                                                                                                                                                                                                                                      |                                                                                                                                                                                                                                                                                                                                                                                                                                                                           |

|               |                                                                                                                                                                                                                                                                                                                                                                                                                                                                                                                                                                                                                                                                                                                                                                                                                                                                                                                                                                               |  |
|---------------|-------------------------------------------------------------------------------------------------------------------------------------------------------------------------------------------------------------------------------------------------------------------------------------------------------------------------------------------------------------------------------------------------------------------------------------------------------------------------------------------------------------------------------------------------------------------------------------------------------------------------------------------------------------------------------------------------------------------------------------------------------------------------------------------------------------------------------------------------------------------------------------------------------------------------------------------------------------------------------|--|
| Head and Neck | <b>Laryngeal/Pharyngeal Cancer</b> <ul style="list-style-type: none"> <li>• Unexplained lump or mass in the neck / throat</li> <li>• <math>\geq 40</math> years old with: <ul style="list-style-type: none"> <li>○ Persistent unexplained hoarseness (<math>\geq 3</math> weeks)</li> <li>○ <math>\geq 4</math> weeks of persistent, particularly unilateral, discomfort in the throat or throat pain</li> </ul> </li> <li>• <math>\geq 40</math> years old with <ul style="list-style-type: none"> <li>○ <math>\geq 3</math> weeks of dysphagia</li> <li>○ <math>\geq 3</math> weeks of odynophagia</li> <li>○ <math>\geq 3</math> weeks of otalgia</li> </ul> </li> </ul>                                                                                                                                                                                                                                                                                                   |  |
|               | <b>Salivary Cancer</b> <ul style="list-style-type: none"> <li>• <math>\geq 40</math> years old with unexplained or persistent parotid or submandibular swelling</li> <li>• Firm sub-mucosal swelling in the oral cavity</li> </ul>                                                                                                                                                                                                                                                                                                                                                                                                                                                                                                                                                                                                                                                                                                                                            |  |
|               | <b>Ear/Nose/Sinus Cancer</b> <ul style="list-style-type: none"> <li>• Persistent unilateral otalgia</li> <li>• Serosanguinous nasal discharge which persists for more than three weeks</li> <li>• Unilateral nasal obstruction associated with a purulent discharge</li> <li>• Facial palsy / cranial neuropathies</li> <li>• Orbital masses</li> <li>• Severe facial pain</li> </ul>                                                                                                                                                                                                                                                                                                                                                                                                                                                                                                                                                                                         |  |
|               | <b>Thyroid Cancer</b> <ul style="list-style-type: none"> <li>• Unexplained solitary thyroid lump</li> <li>• Ultrasound suggestive of thyroid cancer</li> </ul>                                                                                                                                                                                                                                                                                                                                                                                                                                                                                                                                                                                                                                                                                                                                                                                                                |  |
|               | <b>Oral/Lip Cancer</b> <ul style="list-style-type: none"> <li>• <math>\geq 3</math> weeks unexplained ulceration in the oral cavity</li> <li>• Suspicious lump/mass on the lip or in the oral cavity</li> <li>• A red or red and white patch in the oral cavity suggestive of leukoplakia or erythroleukoplakia</li> <li>• Tooth mobility not associated with periodontal disease</li> <li>• Poor healing <math>\geq 3</math> weeks post tooth extraction</li> </ul>                                                                                                                                                                                                                                                                                                                                                                                                                                                                                                          |  |
| Lower GI      | <ul style="list-style-type: none"> <li>• Abnormal lower GI investigations (colonoscopy/flexible sigmoidoscopy) suggestive of cancer</li> <li>• Positive FIT (Faecal Immunochemical Test) suggestive of cancer</li> <li>• Any age with unexplained rectal or abdominal mass</li> <li>• Any age with unexplained anal mass or unexplained anal ulceration</li> <li>• <math>\geq 40</math> years and over with unexplained weight loss and abdominal pain</li> <li>• <math>\leq 50</math> years with rectal bleeding and any of the following unexplained symptoms: <ul style="list-style-type: none"> <li>○ Abdominal pain</li> <li>○ Change in bowel habit</li> <li>○ Weight loss</li> <li>○ Iron deficiency anaemia (attach results)</li> </ul> </li> <li>• <math>\geq 50</math> years with unexplained rectal bleeding</li> <li>• <math>\geq 60</math> years with iron deficiency anaemia</li> <li>• <math>\geq 60</math> years with changes in their bowel habit</li> </ul> |  |

|                  |                                                                                                                                                                                                                                                                                                                                                                                                                                                                                                                                                                                                                                                                                                                                                                                                                                                                                                                                                                                                                                                                                                                                                                                                                                                                                                                                                                                                                                                                                                                                                                                   |  |
|------------------|-----------------------------------------------------------------------------------------------------------------------------------------------------------------------------------------------------------------------------------------------------------------------------------------------------------------------------------------------------------------------------------------------------------------------------------------------------------------------------------------------------------------------------------------------------------------------------------------------------------------------------------------------------------------------------------------------------------------------------------------------------------------------------------------------------------------------------------------------------------------------------------------------------------------------------------------------------------------------------------------------------------------------------------------------------------------------------------------------------------------------------------------------------------------------------------------------------------------------------------------------------------------------------------------------------------------------------------------------------------------------------------------------------------------------------------------------------------------------------------------------------------------------------------------------------------------------------------|--|
| Lung and Pleural | <ul style="list-style-type: none"> <li>• Age <math>\geq</math> 40 years with UNEXPLAINED haemoptysis</li> <li>• Abnormal chest x-ray suggestive of lung cancer or mesothelioma (such as a slowly resolving consolidation or pleural effusion)</li> <li>• Abnormal CT scan suggestive of lung cancer or mesothelioma</li> <li>• Features suggestive of lung cancer metastasis including bone pain, paraneoplastic signs or history of cancer</li> <li>• Normal chest x-ray but high suspicion of lung cancer</li> </ul>                                                                                                                                                                                                                                                                                                                                                                                                                                                                                                                                                                                                                                                                                                                                                                                                                                                                                                                                                                                                                                                            |  |
| Melanoma         | <p>Refer patients with a suspicious pigmented skin lesion with a weighted 7-point checklist score of 3 or more. Each major feature scores 2 points. Each minor feature scores 1 point.</p> <p>Major Features of the lesions (scoring 2 points each):</p> <ul style="list-style-type: none"> <li>• Change in size</li> <li>• Irregular shape</li> <li>• Irregular colour</li> </ul> <p>Minor Features of the lesions (scoring 1 point each):</p> <ul style="list-style-type: none"> <li>• Largest diameter 7 mm or more</li> <li>• Oozing</li> <li>• Inflammation</li> <li>• Change in sensation</li> </ul>                                                                                                                                                                                                                                                                                                                                                                                                                                                                                                                                                                                                                                                                                                                                                                                                                                                                                                                                                                        |  |
| Upper GI         | <p><b>Oesophagus/Stomach</b></p> <ul style="list-style-type: none"> <li>• Dysphagia</li> <li>• Weight loss with any of the following: <ul style="list-style-type: none"> <li>◦ Upper abdominal pain (also consider pancreatic cancer) or reflux oedyspepsia</li> </ul> </li> <li>• Abnormal upper GI endoscopy suggestive of cancer (or high grade dysplasia of oesophagus)</li> <li>• Upper abdominal mass consistent with stomach cancer</li> <li>• Suspicious symptoms or signs but no GP direct access to urgent upper GI endoscopy</li> </ul> <p><b>Pancreas</b></p> <ul style="list-style-type: none"> <li>• People aged 60 and over with weight loss and any of the following: <ul style="list-style-type: none"> <li>◦ diarrhoea, back pain, abdominal pain, nausea, vomiting, constipation, or new-onset diabetes</li> </ul> </li> <li>• Abnormal abdominal CT or ultrasound scan suggestive of pancreatic cancer</li> <li>• <math>\geq</math> 40 years old with jaundice (consider a referral for same day assessment if appropriate)</li> <li>• Suspicious symptoms or signs but no GP direct access to urgent pancreatic CT scan</li> </ul> <p><b>Liver/Gall Bladder</b></p> <ul style="list-style-type: none"> <li>• Upper abdominal mass consistent with an enlarged gall bladder or liver</li> <li>• Abnormal abdominal ultrasound scan suggestive of liver/gallbladder cancer</li> <li>• Upper abdominal mass consistent with an enlarged liver/gall bladder</li> <li>• Suspicious symptoms or signs but no GP direct access to urgent ultrasound scan</li> </ul> |  |

|         |                                                                                                                                                                                                                                                                                                                                                                                                                                                                                                                                                   |                                                                                                                                                                                                                                                                                                                                                                                                                         |
|---------|---------------------------------------------------------------------------------------------------------------------------------------------------------------------------------------------------------------------------------------------------------------------------------------------------------------------------------------------------------------------------------------------------------------------------------------------------------------------------------------------------------------------------------------------------|-------------------------------------------------------------------------------------------------------------------------------------------------------------------------------------------------------------------------------------------------------------------------------------------------------------------------------------------------------------------------------------------------------------------------|
| Urology | <p><b>Testicular Cancer</b><br/>Refer men if they have:</p> <ul style="list-style-type: none"> <li>• A solid intra-testicular lump</li> <li>• Non-painful enlargement or change in shape or texture of the testis</li> <li>• Abnormal ultrasound scan suggestive of testicular cancer</li> </ul>                                                                                                                                                                                                                                                  |                                                                                                                                                                                                                                                                                                                                                                                                                         |
|         | <p><b>Prostate Cancer</b><br/>Refer men if:</p> <ul style="list-style-type: none"> <li>• Prostate feels malignant on digital rectal examination</li> <li>• PSA levels are above the age-specific reference range. For patients with a slightly elevated PSA, a suspected cancer referral is still recommended.</li> </ul>                                                                                                                                                                                                                         |                                                                                                                                                                                                                                                                                                                                                                                                                         |
|         | <p><b>Bladder Cancer</b></p> <ul style="list-style-type: none"> <li>• Adults aged <math>\geq 45</math> with: <ul style="list-style-type: none"> <li>○ UNEXPLAINED visible haematuria without urinary tract infection</li> <li>○ Visible haematuria that persists or recurs after successful treatment of urinary tract infection</li> </ul> </li> <li>• Adults aged <math>\geq 60</math> with: <ul style="list-style-type: none"> <li>○ UNEXPLAINED non-visible haematuria and either dysuria or a raised white cell count</li> </ul> </li> </ul> | <p>Blood Cancer GPs should consider non-urgent referral for bladder cancer in people aged 60 and over with recurrent or persistent UNEXPLAINED urinary tract infection. 'Non-visible' or 'trace' haematuria is determined by dipstick urinalysis of a fresh urine sample. Dipstick testing is preferable to microscopy as it is more reliable and not compromised by haemolysis; the test should be repeated twice.</p> |
|         | <p><b>Renal Cancer</b></p> <ul style="list-style-type: none"> <li>• Abnormal ultrasound scan suggestive of renal cancer</li> <li>• Adults <math>\geq 45</math> with: <ul style="list-style-type: none"> <li>○ UNEXPLAINED visible haematuria without urinary tract infection</li> <li>○ Visible haematuria that persists or recurs after successful treatment of urinary tract infection</li> </ul> </li> <li>• Asymptomatic renal cysts described as simple in the radiology report do not require referral.</li> </ul>                          |                                                                                                                                                                                                                                                                                                                                                                                                                         |
|         | <p><b>Penile Cancer</b></p> <ul style="list-style-type: none"> <li>• Penile mass or ulcerated lesion, where a sexually transmitted infection has been excluded as a cause</li> <li>• Persistent penile lesion after treatment for a sexually transmitted infection has been completed</li> <li>• Unexplained or persistent symptoms affecting the foreskin or glans</li> </ul>                                                                                                                                                                    |                                                                                                                                                                                                                                                                                                                                                                                                                         |

## Supplementary References

1. National Cancer Registration and Analysis Service (NCRAS). 2018, Public Health England.
2. Andersson, T.M., et al., *Estimating and modelling cure in population-based cancer studies within the framework of flexible parametric survival models*. BMC Med Res Methodol, 2011. **11**: p. 96.
3. *National Life Tables (2016-2018)*. Office for National Statistics (ONS), U.K. .
4. Lee, Y.H., et al., *Effect of length of time from diagnosis to treatment on colorectal cancer survival: A population-based study*. PLoS One, 2019. **14**(1): p. e0210465.
5. Richards, M.A., et al., *Influence of delay on survival in patients with breast cancer: a systematic review*. Lancet, 1999. **353**(9159): p. 1119-26.
6. Mano, R., et al., *The effect of delaying nephrectomy on oncologic outcomes in patients with renal tumors greater than 4cm*. Urologic Oncology: Seminars and Original Investigations, 2016. **34**(5): p. 239.e1-239.e8.
7. Smith, E.C., A. Ziogas, and H. Anton-Culver, *Delay in Surgical Treatment and Survival After Breast Cancer Diagnosis in Young Women by Race/Ethnicity*. JAMA Surgery, 2013. **148**(6): p. 516-523.
8. Chu, A.T., et al., *Delays in radical cystectomy for muscle-invasive bladder cancer*. Cancer, 2019. **125**(12): p. 2011-2017.
9. Sánchez-Ortiz, R.F., et al., *An interval longer than 12 weeks between the diagnosis of muscle invasion and cystectomy is associated with worse outcome in bladder carcinoma*. The Journal of urology, 2003. **169**(1): p. 110-5; discussion 115.
10. May, M., et al., *Significance of the time period between diagnosis of muscle invasion and radical cystectomy with regard to the prognosis of transitional cell carcinoma of the urothelium in the bladder*. Scandinavian Journal of Urology and Nephrology, 2004. **38**(3): p. 231-235.
11. Bleicher, R.J., et al., *Time to Surgery and Breast Cancer Survival in the United States*. JAMA Oncology, 2016. **2**(3): p. 330-339.
12. Richards, M.A., et al., *The influence on survival of delay in the presentation and treatment of symptomatic breast cancer*. British journal of cancer, 1999. **79**(5-6): p. 858-864.
13. Yang, C.-F.J., et al., *Impact of Timing of Lobectomy on Survival for Clinical Stage IA Lung Squamous Cell Carcinoma*. CHEST, 2017. **152**(6): p. 1239-1250.
14. Gatto, N.M., et al., *Risk of perforation after colonoscopy and sigmoidoscopy: a population-based study*. J Natl Cancer Inst, 2003. **95**(3): p. 230-6.
15. Eapen, G.A., et al., *Complications, consequences, and practice patterns of endobronchial ultrasound-guided transbronchial needle aspiration: Results of the AQuIRE registry*. Chest, 2013. **143**(4): p. 1044-1053.
16. Hiraishi, Y., et al., *Hospital Volume and Mortality following Diagnostic Bronchoscopy in Lung Cancer Patients: Data from a National Inpatient Database in Japan*. Respiration, 2019. **97**(3): p. 264-272.
17. Botteman, M.F., et al., *The health economics of bladder cancer*. Pharmacoeconomics, 2003. **21**(18): p. 1315-1330.
18. Gronthoud, F., *Rates of Nosomial Infection at an Acute UK Surgical Oncology Centre*. 2020.
19. Rivett, L., et al., *Screening of healthcare workers for SARS-CoV-2 highlights the role of asymptomatic carriage in COVID-19 transmission*. Elife, 2020. **9**.
20. Black, J.R.M., C. Bailey, and C. Swanton, *COVID-19: the case for health-care worker screening to prevent hospital transmission*. Lancet, 2020.
21. Wang, D., et al., *Clinical Characteristics of 138 Hospitalized Patients With 2019 Novel Coronavirus-Infected Pneumonia in Wuhan, China*. Jama, 2020.
22. *Mortality and pulmonary complications in patients undergoing surgery with perioperative SARS-CoV-2 infection: an international cohort study*. Lancet, 2020.
23. *The Epidemiological Characteristics of an Outbreak of 2019 Novel Coronavirus Diseases (COVID-19)*. 2020, China CCDC.
24. Docherty, A.B., et al., *Features of 16,749 hospitalised UK patients with COVID-19 using the ISARIC WHO Clinical Characterisation Protocol*. medRxiv, 2020.
25. Liang, W., et al., *Cancer patients in SARS-CoV-2 infection: a nationwide analysis in China*. Lancet Oncol, 2020. **21**(3): p. 335-337.
26. Williams, M., et al., *Estimating the risk of death from COVID Infection in Adult Cancer Patients*. medRxiv, 2020.
27. Lai, A., et al., *Estimating excess mortality in people with cancer and multimorbidity in the COVID-19 emergency*, in *Lancet Oncol (in Press)*. 2020.
28. *Local data in combination with expert clinical surgical/anaesthetic review (authors): D.L.N., S.J., S.A.B., M.W.*
