# Supplementary material
Source: PubMed Central journal article supplement (PMC7833522)
Supplement: mmc2.pdf [file mmc2.pdf]

## Supplementary appendix 2

This appendix formed part of the original submission and has been peer reviewed. We post it as supplied by the authors.

Supplement to: Sud A, Torr B, Jones ME, et al. Effect of delays in the 2-week-wait cancer referral pathway during the COVID-19 pandemic on cancer survival in the UK: a modelling study. *Lancet Oncol* 2020; published online July 20. [http://dx.doi.org/10.1016/S1470-2045\(20\)30392-2](http://dx.doi.org/10.1016/S1470-2045(20)30392-2).

**Supplementary Table 5a: Impact of presentational delay during 'lockdown' and scenario**  
**-Assumptions:** ~3 month lockdown period with uniform reduction in 2WW referrals of 25%/ ascribed with 2 months of 'presentational delay' (an averaged estimate).  
**-Three mitigation scenarios are modelled** (i) provide all additional capacity required in mor

| Referral Delays |   |                        |     |
|-----------------|---|------------------------|-----|
| Months Delay    | 3 | Reduction in referrals | 25% |

|                                |          | Month 1 | Month 2 | Month 3   | Month 4 | Month 5  | Month 6  |
|--------------------------------|----------|---------|---------|-----------|---------|----------|----------|
|                                |          | July    | August  | September | October | November | December |
| Lives lost per period of delay |          |         |         |           |         |          |          |
| LY lost per period of delay    |          |         |         |           |         |          |          |
| (i)                            | Capacity | 175%    | 100%    | 100%      | 100%    | 100%     | 100%     |
| Backlog from dela              | 75%      | 75%     | 0%      | 0%        | 0%      | 0%       | 0%       |
| Month 1                        | 100%     | 100%    | 0%      | 0%        | 0%      | 0%       | 0%       |
| Month 2                        | 100%     |         | 100%    | 0%        | 0%      | 0%       | 0%       |
| Month 3                        | 100%     |         |         | 100%      | 0%      | 0%       | 0%       |
| Month 4                        | 100%     |         |         |           | 100%    | 0%       | 0%       |
| Month 5                        | 100%     |         |         |           |         | 100%     | 0%       |
| Month 6                        | 100%     |         |         |           |         |          | 100%     |
| Month 7                        | 100%     |         |         |           |         |          |          |
| Month 8                        | 100%     |         |         |           |         |          |          |
| Month 9                        | 100%     |         |         |           |         |          |          |
| Month 10                       | 100%     |         |         |           |         |          |          |
| Month 11                       | 100%     |         |         |           |         |          |          |
| Month 12                       | 100%     |         |         |           |         |          |          |

|                   |          |      |      |      |      |      |      |
|-------------------|----------|------|------|------|------|------|------|
| (ii)              | Capacity | 125% | 125% | 125% | 100% | 100% | 100% |
| Backlog from dela | 75%      | 54%  | 21%  | 0%   | 0%   | 0%   | 0%   |
| Month 1           | 100%     | 71%  | 29%  | 0%   | 0%   | 0%   | 0%   |
| Month 2           | 100%     |      | 75%  | 25%  | 0%   | 0%   | 0%   |
| Month 3           | 100%     |      |      | 100% | 0%   | 0%   | 0%   |
| Month 4           | 100%     |      |      |      | 100% | 0%   | 0%   |
| Month 5           | 100%     |      |      |      |      | 100% | 0%   |
| Month 6           | 100%     |      |      |      |      |      | 100% |
| Month 7           | 100%     |      |      |      |      |      |      |
| Month 8           | 100%     |      |      |      |      |      |      |
| Month 9           | 100%     |      |      |      |      |      |      |
| Month 10          | 100%     |      |      |      |      |      |      |
| Month 11          | 100%     |      |      |      |      |      |      |
| Month 12          | 100%     |      |      |      |      |      |      |

|                   |          |      |      |      |      |      |      |
|-------------------|----------|------|------|------|------|------|------|
| (iii)             | Capacity | 100% | 100% | 113% | 113% | 113% | 113% |
| Backlog from dela | 75%      | 43%  | 32%  | 0%   | 0%   | 0%   | 0%   |
| Month 1           | 100%     | 57%  | 43%  | 0%   | 0%   | 0%   | 0%   |
| Month 2           | 100%     |      | 25%  | 75%  | 0%   | 0%   | 0%   |
| Month 3           | 100%     |      |      | 38%  | 63%  | 0%   | 0%   |
| Month 4           | 100%     |      |      |      | 50%  | 50%  | 0%   |
| Month 5           | 100%     |      |      |      |      | 63%  | 38%  |

|          |      |  |  |  |  |  |     |
|----------|------|--|--|--|--|--|-----|
| Month 6  | 100% |  |  |  |  |  | 75% |
| Month 7  | 100% |  |  |  |  |  |     |
| Month 8  | 100% |  |  |  |  |  |     |
| Month 9  | 100% |  |  |  |  |  |     |
| Month 10 | 100% |  |  |  |  |  |     |
| Month 11 | 100% |  |  |  |  |  |     |
| Month 12 | 100% |  |  |  |  |  |     |

| Referral Delays |   |                        |     |
|-----------------|---|------------------------|-----|
| Months Delay    | 3 | Reduction in referrals | 50% |

|                                |          | Month 1 | Month 2 | Month 3   | Month 4 | Month 5  | Month 6  |
|--------------------------------|----------|---------|---------|-----------|---------|----------|----------|
|                                |          | July    | August  | September | October | November | December |
| Lives lost per period of delay |          |         |         |           |         |          |          |
| LY lost per period of delay    |          |         |         |           |         |          |          |
| (iv)                           | Capacity | 250%    | 100%    | 100%      | 100%    | 100%     | 100%     |
| Backlog from delay             | 150%     | 150%    | 0%      | 0%        | 0%      | 0%       | 0%       |
| Month 1                        | 100%     | 100%    | 0%      | 0%        | 0%      | 0%       | 0%       |
| Month 2                        | 100%     |         | 100%    | 0%        | 0%      | 0%       | 0%       |
| Month 3                        | 100%     |         |         | 100%      | 0%      | 0%       | 0%       |
| Month 4                        | 100%     |         |         |           | 100%    | 0%       | 0%       |
| Month 5                        | 100%     |         |         |           |         | 100%     | 0%       |
| Month 6                        | 100%     |         |         |           |         |          | 100%     |
| Month 7                        | 100%     |         |         |           |         |          |          |
| Month 8                        | 100%     |         |         |           |         |          |          |
| Month 9                        | 100%     |         |         |           |         |          |          |
| Month 10                       | 100%     |         |         |           |         |          |          |
| Month 11                       | 100%     |         |         |           |         |          |          |
| Month 12                       | 100%     |         |         |           |         |          |          |

|                    |          |      |      |      |      |      |      |
|--------------------|----------|------|------|------|------|------|------|
| (v)                | Capacity | 150% | 150% | 150% | 100% | 100% | 100% |
| Backlog from delay | 150%     | 90%  | 60%  | 0%   | 0%   | 0%   | 0%   |
| Month 1            | 100%     | 60%  | 40%  | 0%   | 0%   | 0%   | 0%   |
| Month 2            | 100%     |      | 50%  | 50%  | 0%   | 0%   | 0%   |
| Month 3            | 100%     |      |      | 100% | 0%   | 0%   | 0%   |
| Month 4            | 100%     |      |      |      | 100% | 0%   | 0%   |
| Month 5            | 100%     |      |      |      |      | 100% | 0%   |
| Month 6            | 100%     |      |      |      |      |      | 100% |
| Month 7            | 100%     |      |      |      |      |      |      |
| Month 8            | 100%     |      |      |      |      |      |      |
| Month 9            | 100%     |      |      |      |      |      |      |
| Month 10           | 100%     |      |      |      |      |      |      |
| Month 11           | 100%     |      |      |      |      |      |      |
| Month 12           | 100%     |      |      |      |      |      |      |

|                    |          |      |      |      |      |      |      |
|--------------------|----------|------|------|------|------|------|------|
| (vi)               | Capacity | 100% | 100% | 125% | 125% | 125% | 125% |
| Backlog from delay | 150%     | 60%  | 60%  | 30%  | 0%   | 0%   | 0%   |
| Month 1            | 100%     | 40%  | 40%  | 20%  | 0%   | 0%   | 0%   |
| Month 2            | 100%     |      | 0%   | 75%  | 25%  | 0%   | 0%   |

|          |      |  |  |    |      |      |     |
|----------|------|--|--|----|------|------|-----|
| Month 3  | 100% |  |  | 0% | 100% | 0%   | 0%  |
| Month 4  | 100% |  |  |    | 0%   | 100% | 0%  |
| Month 5  | 100% |  |  |    |      | 25%  | 75% |
| Month 6  | 100% |  |  |    |      |      | 50% |
| Month 7  | 100% |  |  |    |      |      |     |
| Month 8  | 100% |  |  |    |      |      |     |
| Month 9  | 100% |  |  |    |      |      |     |
| Month 10 | 100% |  |  |    |      |      |     |
| Month 11 | 100% |  |  |    |      |      |     |
| Month 12 | 100% |  |  |    |      |      |     |

| Referral Delays |   |                        |     |
|-----------------|---|------------------------|-----|
| Months Delay    | 3 | Reduction in referrals | 75% |

|                                | Month 1 | Month 2 | Month 3   | Month 4 | Month 5  | Month 6  |
|--------------------------------|---------|---------|-----------|---------|----------|----------|
|                                | July    | August  | September | October | November | December |
| Lives lost per period of delay |         |         |           |         |          |          |
| LY lost per period of delay    |         |         |           |         |          |          |
| (vii) Capacity                 | 325%    | 100%    | 100%      | 100%    | 100%     | 100%     |
| Backlog from delay             | 225%    | 225%    | 0%        | 0%      | 0%       | 0%       |
| Month 1                        | 100%    | 100%    | 0%        | 0%      | 0%       | 0%       |
| Month 2                        | 100%    |         | 100%      | 0%      | 0%       | 0%       |
| Month 3                        | 100%    |         |           | 100%    | 0%       | 0%       |
| Month 4                        | 100%    |         |           |         | 100%     | 0%       |
| Month 5                        | 100%    |         |           |         |          | 100%     |
| Month 6                        | 100%    |         |           |         |          |          |
| Month 7                        | 100%    |         |           |         |          |          |
| Month 8                        | 100%    |         |           |         |          |          |
| Month 9                        | 100%    |         |           |         |          |          |
| Month 10                       | 100%    |         |           |         |          |          |
| Month 11                       | 100%    |         |           |         |          |          |
| Month 12                       | 100%    |         |           |         |          |          |

|                    |      |      |      |      |      |      |
|--------------------|------|------|------|------|------|------|
| (viii) Capacity    | 175% | 175% | 175% | 100% | 100% | 100% |
| Backlog from delay | 225% | 121% | 104% | 0%   | 0%   | 0%   |
| Month 1            | 100% | 54%  | 46%  | 0%   | 0%   | 0%   |
| Month 2            | 100% |      | 25%  | 75%  | 0%   | 0%   |
| Month 3            | 100% |      |      | 100% | 0%   | 0%   |
| Month 4            | 100% |      |      |      | 100% | 0%   |
| Month 5            | 100% |      |      |      |      | 100% |
| Month 6            | 100% |      |      |      |      |      |
| Month 7            | 100% |      |      |      |      |      |
| Month 8            | 100% |      |      |      |      |      |
| Month 9            | 100% |      |      |      |      |      |
| Month 10           | 100% |      |      |      |      |      |
| Month 11           | 100% |      |      |      |      |      |
| Month 12           | 100% |      |      |      |      |      |

|               |      |      |      |      |      |      |
|---------------|------|------|------|------|------|------|
| (ix) Capacity | 100% | 100% | 138% | 138% | 138% | 138% |
|---------------|------|------|------|------|------|------|

|                   |      |     |     |     |     |     |      |
|-------------------|------|-----|-----|-----|-----|-----|------|
| Backlog from dela | 225% | 69% | 69% | 87% | 0%  | 0%  | 0%   |
| Month 1           | 100% | 31% | 31% | 38% | 0%  | 0%  | 0%   |
| Month 2           | 100% |     | 0%  | 13% | 88% | 0%  | 0%   |
| Month 3           | 100% |     |     | 0%  | 50% | 50% | 0%   |
| Month 4           | 100% |     |     |     | 0%  | 88% | 13%  |
| Month 5           | 100% |     |     |     |     | 0%  | 100% |
| Month 6           | 100% |     |     |     |     |     | 25%  |
| Month 7           | 100% |     |     |     |     |     |      |
| Month 8           | 100% |     |     |     |     |     |      |
| Month 9           | 100% |     |     |     |     |     |      |
| Month 10          | 100% |     |     |     |     |     |      |
| Month 11          | 100% |     |     |     |     |     |      |
| Month 12          | 100% |     |     |     |     |     |      |

**os of subsequent 'diagnostic delay' (FIXED)**

50%/75%. This deficit of patients then all present in month 1 post 'lockdown lift' (July) as a 'b

th 1, (ii) additional capacity spread across months 1-3, (iii) additional capacity spread across 1

| Month 7                | Month 8  | Month 9 | Month 10 | Month 11 | Month 12 | Impa     |         |          |
|------------------------|----------|---------|----------|----------|----------|----------|---------|----------|
| January                | February | March   | April    | May      | June     | 0 months | 1 month | 2 months |
|                        |          |         |          |          |          |          | 118     | 241      |
|                        |          |         |          |          |          |          | 2,151   | 4,421    |
| 100%                   | 100%     | 100%    | 100%     | 100%     | 100%     |          |         |          |
| 0%                     | 0%       | 0%      | 0%       | 0%       | 0%       |          |         | 75%      |
| 0%                     | 0%       | 0%      | 0%       | 0%       | 0%       | 100%     |         |          |
| 0%                     | 0%       | 0%      | 0%       | 0%       | 0%       | 100%     |         |          |
| 0%                     | 0%       | 0%      | 0%       | 0%       | 0%       | 100%     |         |          |
| 0%                     | 0%       | 0%      | 0%       | 0%       | 0%       | 100%     |         |          |
| 0%                     | 0%       | 0%      | 0%       | 0%       | 0%       | 100%     |         |          |
| 100%                   | 0%       | 0%      | 0%       | 0%       | 0%       | 100%     |         |          |
|                        | 100%     | 0%      | 0%       | 0%       | 0%       | 100%     |         |          |
|                        |          | 100%    | 0%       | 0%       | 0%       | 100%     |         |          |
|                        |          |         | 100%     | 0%       | 0%       | 100%     |         |          |
|                        |          |         |          | 100%     | 0%       | 100%     |         | /        |
|                        |          |         |          |          | 100%     | 100%     | /       | /        |
| <b>Total</b>           |          |         |          |          |          | 1200%    | 0%      | 75%      |
| <b>Lives lost</b>      |          |         |          |          |          | 0        | 0       | 181      |
| <b>Life-Years lost</b> |          |         |          |          |          | 0        | 0       | 3316     |
| 100%                   | 100%     | 100%    | 100%     | 100%     | 100%     |          |         |          |
| 0%                     | 0%       | 0%      | 0%       | 0%       | 0%       |          |         | 54%      |
| 0%                     | 0%       | 0%      | 0%       | 0%       | 0%       | 71%      | 29%     |          |
| 0%                     | 0%       | 0%      | 0%       | 0%       | 0%       | 75%      | 25%     |          |
| 0%                     | 0%       | 0%      | 0%       | 0%       | 0%       | 100%     | 0%      |          |
| 0%                     | 0%       | 0%      | 0%       | 0%       | 0%       | 100%     | 0%      |          |
| 0%                     | 0%       | 0%      | 0%       | 0%       | 0%       | 100%     | 0%      |          |
| 0%                     | 0%       | 0%      | 0%       | 0%       | 0%       | 100%     | 0%      |          |
| 100%                   | 0%       | 0%      | 0%       | 0%       | 0%       | 100%     | 0%      |          |
|                        | 100%     | 0%      | 0%       | 0%       | 0%       | 100%     | 0%      |          |
|                        |          | 100%    | 0%       | 0%       | 0%       | 100%     | 0%      |          |
|                        |          |         | 100%     | 0%       | 0%       | 100%     | 0%      |          |
|                        |          |         |          | 100%     | 0%       | 100%     | 0%      | /        |
|                        |          |         |          |          | 100%     | 100%     | /       | /        |
| <b>Total</b>           |          |         |          |          |          | 1146%    | 54%     | 54%      |
| <b>Lives lost</b>      |          |         |          |          |          | 0        | 63      | 129      |
| <b>Life-Years lost</b> |          |         |          |          |          | 0        | 1152    | 2369     |
| 113%                   | 113%     | 100%    | 100%     | 100%     | 100%     |          |         |          |
| 0%                     | 0%       | 0%      | 0%       | 0%       | 0%       |          |         | 43%      |
| 0%                     | 0%       | 0%      | 0%       | 0%       | 0%       | 57%      | 43%     |          |
| 0%                     | 0%       | 0%      | 0%       | 0%       | 0%       | 25%      | 75%     |          |
| 0%                     | 0%       | 0%      | 0%       | 0%       | 0%       | 38%      | 63%     |          |
| 0%                     | 0%       | 0%      | 0%       | 0%       | 0%       | 50%      | 50%     |          |
| 0%                     | 0%       | 0%      | 0%       | 0%       | 0%       | 63%      | 38%     |          |



|                        |      |      |      |      |      |      |      |       |      |
|------------------------|------|------|------|------|------|------|------|-------|------|
| 0%                     | 0%   | 0%   | 0%   | 0%   | 0%   |      | 100% |       |      |
| 0%                     | 0%   | 0%   | 0%   | 0%   | 0%   |      | 100% |       |      |
| 0%                     | 0%   | 0%   | 0%   | 0%   | 0%   | 25%  | 75%  |       |      |
| 50%                    | 0%   | 0%   | 0%   | 0%   | 0%   | 50%  | 50%  |       |      |
| 75%                    | 25%  | 0%   | 0%   | 0%   | 0%   | 75%  | 25%  |       |      |
|                        | 100% | 0%   | 0%   | 0%   | 0%   | 100% |      |       |      |
|                        |      | 100% | 0%   | 0%   | 0%   | 100% |      |       |      |
|                        |      |      | 100% | 0%   | 0%   | 100% |      |       |      |
|                        |      |      |      | 100% | 0%   | 100% |      | /     |      |
|                        |      |      |      |      | 100% | 100% | /    | /     |      |
| <b>Total</b>           |      |      |      |      |      |      | 690% | 465%  | 105% |
| <b>Lives lost</b>      |      |      |      |      |      |      | 0    | 547   | 253  |
| <b>Life-Years lost</b> |      |      |      |      |      |      | 0    | 10002 | 4643 |

| Month 7                | Month 8  | Month 9 | Month 10 | Month 11 | Month 12 | Impa     |         |          |      |
|------------------------|----------|---------|----------|----------|----------|----------|---------|----------|------|
| January                | February | March   | April    | May      | June     | 0 months | 1 month | 2 months |      |
|                        |          |         |          |          |          |          | 118     | 241      |      |
|                        |          |         |          |          |          |          | 2,151   | 4,421    |      |
| 100%                   | 100%     | 100%    | 100%     | 100%     | 100%     |          |         |          |      |
| 0%                     | 0%       | 0%      | 0%       | 0%       | 0%       |          |         | 225%     |      |
| 0%                     | 0%       | 0%      | 0%       | 0%       | 0%       | 100%     |         |          |      |
| 0%                     | 0%       | 0%      | 0%       | 0%       | 0%       | 100%     |         |          |      |
| 0%                     | 0%       | 0%      | 0%       | 0%       | 0%       | 100%     |         |          |      |
| 0%                     | 0%       | 0%      | 0%       | 0%       | 0%       | 100%     |         |          |      |
| 0%                     | 0%       | 0%      | 0%       | 0%       | 0%       | 100%     |         |          |      |
| 0%                     | 0%       | 0%      | 0%       | 0%       | 0%       | 100%     |         |          |      |
| 100%                   | 0%       | 0%      | 0%       | 0%       | 0%       | 100%     |         |          |      |
|                        | 100%     | 0%      | 0%       | 0%       | 0%       | 100%     |         |          |      |
|                        |          | 100%    | 0%       | 0%       | 0%       | 100%     |         |          |      |
|                        |          |         | 100%     | 0%       | 0%       | 100%     |         |          |      |
|                        |          |         |          | 100%     | 0%       | 100%     |         | /        |      |
|                        |          |         |          |          | 100%     | 100%     | /       | /        |      |
| <b>Total</b>           |          |         |          |          |          |          | 1200%   | 0%       | 225% |
| <b>Lives lost</b>      |          |         |          |          |          |          | 0       | 0        | 542  |
| <b>Life-Years lost</b> |          |         |          |          |          |          | 0       | 0        | 9948 |
| 100%                   | 100%     | 100%    | 100%     | 100%     | 100%     |          |         | 121%     |      |
| 0%                     | 0%       | 0%      | 0%       | 0%       | 0%       |          |         |          |      |
| 0%                     | 0%       | 0%      | 0%       | 0%       | 0%       | 54%      | 46%     |          |      |
| 0%                     | 0%       | 0%      | 0%       | 0%       | 0%       | 25%      | 75%     |          |      |
| 0%                     | 0%       | 0%      | 0%       | 0%       | 0%       | 100%     |         |          |      |
| 0%                     | 0%       | 0%      | 0%       | 0%       | 0%       | 100%     |         |          |      |
| 0%                     | 0%       | 0%      | 0%       | 0%       | 0%       | 100%     |         |          |      |
| 0%                     | 0%       | 0%      | 0%       | 0%       | 0%       | 100%     |         |          |      |
| 100%                   | 0%       | 0%      | 0%       | 0%       | 0%       | 100%     |         |          |      |
|                        | 100%     | 0%      | 0%       | 0%       | 0%       | 100%     |         |          |      |
|                        |          | 100%    | 0%       | 0%       | 0%       | 100%     |         |          |      |
|                        |          |         | 100%     | 0%       | 0%       | 100%     |         |          |      |
|                        |          |         |          | 100%     | 0%       | 100%     |         | /        |      |
|                        |          |         |          |          | 100%     | 100%     | /       | /        |      |
| <b>Total</b>           |          |         |          |          |          |          | 1079%   | 121%     | 121% |
| <b>Lives lost</b>      |          |         |          |          |          |          | 0       | 143      | 292  |
| <b>Life-Years lost</b> |          |         |          |          |          |          | 0       | 2606     | 5357 |
| 138%                   | 138%     | 100%    | 100%     | 100%     | 100%     |          |         |          |      |



|     |      |      |      |      |      |                        |      |      |       |
|-----|------|------|------|------|------|------------------------|------|------|-------|
| 0%  | 0%   | 0%   | 0%   | 0%   | 0%   |                        |      | 69%  |       |
| 0%  | 0%   | 0%   | 0%   | 0%   | 0%   | 31%                    | 31%  | 38%  |       |
| 0%  | 0%   | 0%   | 0%   | 0%   | 0%   |                        | 13%  | 88%  |       |
| 0%  | 0%   | 0%   | 0%   | 0%   | 0%   |                        | 50%  | 50%  |       |
| 0%  | 0%   | 0%   | 0%   | 0%   | 0%   |                        | 88%  | 13%  |       |
| 0%  | 0%   | 0%   | 0%   | 0%   | 0%   |                        | 100% |      |       |
| 75% | 0%   | 0%   | 0%   | 0%   | 0%   | 25%                    | 75%  |      |       |
| 63% | 38%  | 0%   | 0%   | 0%   | 0%   | 63%                    | 38%  |      |       |
|     | 100% | 0%   | 0%   | 0%   | 0%   | 100%                   |      |      |       |
|     |      | 100% | 0%   | 0%   | 0%   | 100%                   |      |      |       |
|     |      |      | 100% | 0%   | 0%   | 100%                   |      |      |       |
|     |      |      |      | 100% | 0%   | 100%                   |      | /    |       |
|     |      |      |      |      | 100% | 100%                   | /    | /    |       |
|     |      |      |      |      |      | <b>Total</b>           | 618% | 393% | 258%  |
|     |      |      |      |      |      | <b>Lives lost</b>      | 0    | 463  | 621   |
|     |      |      |      |      |      | <b>Life-Years lost</b> | 0    | 8459 | 11394 |

backlog'; each individual is

months 3-8.

| List of Delays |          |       |        |
|----------------|----------|-------|--------|
| 3 months       | 4 months | Total | Excess |
| 369            | 501      |       |        |
| 6,799          | 9,272    |       |        |
|                |          |       |        |
|                |          |       |        |
|                |          |       |        |
|                |          |       |        |
|                |          |       |        |
|                |          |       |        |
|                |          |       |        |
|                | /        |       |        |
| /              | /        |       |        |
| /              | /        |       |        |
| /              | /        |       |        |
| 0%             | 0%       |       |        |
| 0              | 0        | 181   | 0      |
| 0              | 0        | 3316  | 0      |
|                |          |       |        |
| 21%            |          |       |        |
|                |          |       |        |
|                |          |       |        |
|                |          |       |        |
|                |          |       |        |
|                |          |       |        |
|                |          |       |        |
|                | /        |       |        |
| /              | /        |       |        |
| /              | /        |       |        |
| /              | /        |       |        |
| 21%            | 0%       |       |        |
| 79             | 0        | 271   | 90     |
| 1457           | 0        | 4978  | 1662   |
|                |          |       |        |
| 32%            |          |       |        |
|                |          |       |        |
|                |          |       |        |
|                |          |       |        |
|                |          |       |        |

|      |    |       |      |
|------|----|-------|------|
|      |    |       |      |
|      |    |       |      |
|      |    |       |      |
|      | /  |       |      |
| /    | /  |       |      |
| /    | /  |       |      |
| /    | /  |       |      |
| 32%  | 0% |       |      |
| 119  | 0  | 581   | 401  |
| 2185 | 0  | 10649 | 7332 |

| ct of Delays |          |       |        |
|--------------|----------|-------|--------|
| 3 months     | 4 months | Total | Excess |
| 369          | 501      |       |        |
| 6,799        | 9,272    |       |        |

|    |    |      |   |
|----|----|------|---|
|    |    |      |   |
|    |    |      |   |
|    |    |      |   |
|    |    |      |   |
|    |    |      |   |
|    |    |      |   |
|    |    |      |   |
|    |    |      |   |
|    |    |      |   |
|    | /  |      |   |
| /  | /  |      |   |
| /  | /  |      |   |
| /  | /  |      |   |
| 0% | 0% |      |   |
| 0  | 0  | 361  | 0 |
| 0  | 0  | 6632 | 0 |

|      |    |      |      |
|------|----|------|------|
| 60%  |    |      |      |
|      |    |      |      |
|      |    |      |      |
|      |    |      |      |
|      |    |      |      |
|      |    |      |      |
|      |    |      |      |
|      |    |      |      |
|      | /  |      |      |
| /    | /  |      |      |
| /    | /  |      |      |
| /    | /  |      |      |
| 60%  | 0% |      |      |
| 221  | 0  | 544  | 183  |
| 4079 | 0  | 9995 | 3362 |

|     |     |  |  |
|-----|-----|--|--|
| 60% | 30% |  |  |
|     |     |  |  |
|     |     |  |  |

|      |      |       |       |
|------|------|-------|-------|
|      |      |       |       |
|      |      |       |       |
|      |      |       |       |
|      |      |       |       |
|      |      |       |       |
|      |      |       |       |
|      | /    |       |       |
| /    | /    |       |       |
| /    | /    |       |       |
| /    | /    |       |       |
| 60%  | 30%  |       |       |
| 221  | 150  | 1172  | 811   |
| 4079 | 2782 | 21506 | 14873 |

| ct of Delays |          |       |        |
|--------------|----------|-------|--------|
| 3 months     | 4 months | Total | Excess |
| 369          | 501      |       |        |
| 6,799        | 9,272    |       |        |
|              |          |       |        |
|              |          |       |        |
|              |          |       |        |
|              |          |       |        |
|              |          |       |        |
|              |          |       |        |
|              |          |       |        |
|              | /        |       |        |
| /            | /        |       |        |
| /            | /        |       |        |
| /            | /        |       |        |
| 0%           | 0%       |       |        |
| 0            | 0        | 542   | 0      |
| 0            | 0        | 9948  | 0      |
| 104%         |          |       |        |
|              |          |       |        |
|              |          |       |        |
|              |          |       |        |
|              |          |       |        |
|              |          |       |        |
|              |          |       |        |
|              |          |       |        |
|              | /        |       |        |
| /            | /        |       |        |
| /            | /        |       |        |
| /            | /        |       |        |
| 104%         | 0%       |       |        |
| 383          | 0        | 818   | 276    |
| 7061         | 0        | 15023 | 5075   |

|      |      |       |       |
|------|------|-------|-------|
| 69%  | 87%  |       |       |
|      |      |       |       |
|      |      |       |       |
|      |      |       |       |
|      |      |       |       |
|      |      |       |       |
|      |      |       |       |
|      |      |       |       |
|      | /    |       |       |
| /    | /    |       |       |
| /    | /    |       |       |
| /    | /    |       |       |
| 69%  | 87%  |       |       |
| 256  | 434  | 1773  | 1231  |
| 4707 | 8024 | 32584 | 22635 |
